# Supplementary material for: Endothelial to mesenchymal transition is common in atherosclerotic lesions and is associated with plaque instability
Source: PubMed Central journal article supplement (PMC4931033; doi:10.1038/ncomms11853), 2016-06-24
Supplement: ncomms11853-s3.pdf [file ncomms11853-s3.pdf]

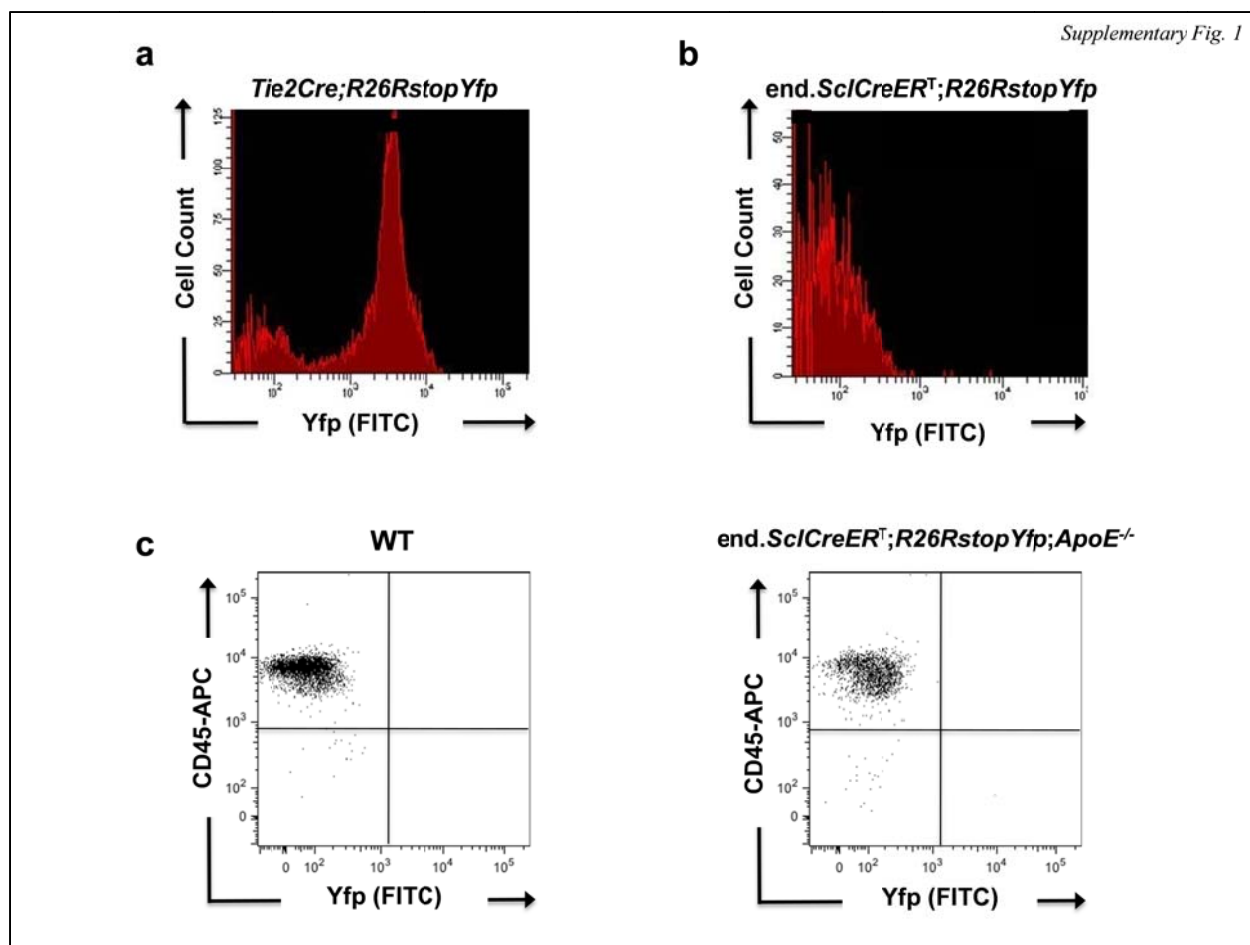

**Supplementary Fig. 1. Specificity of endothelial cell fate tracking models by FACS.** (a) Representative FACS histogram of peripheral leukocytes from adult *Tie2Cre;R26RstopYfp* mice. Preliminary experiments confirmed that >50% of all peripheral blood leukocytes express Yfp (seen in FITC channel) in this mouse model (not presented). (b) Representative FACS histogram of peripheral blood leukocytes from adult tamoxifen-induced *end.Sc1CreER<sup>T</sup>;R26RstopYfp* mice. (c) FACS scatter plots of peripheral leukocytes from WT and tamoxifen-induced, HFD-fed *end.Sc1CreER<sup>T</sup>;R26RstopYfp;ApoE<sup>-/-</sup>* mice at 18 weeks of age for CD45 (APC conjugated) and Yfp (detected in FITC channel). Of CD45<sup>+</sup> cells, the mean percentage of events detected in the FITC channel in *end.Sc1CreER<sup>T</sup>;R26RstopYfp;ApoE<sup>-/-</sup>* mice at 18 weeks of age was  $0.09 \pm 0.05\%$  ( $n = 4$ ), which did not differ from WT control mice ( $0.07 \pm 0.07\%$ ;  $n = 3$ ;  $p = 0.76$  for WT versus *end.Sc1CreER<sup>T</sup>;R26RstopYfp;ApoE<sup>-/-</sup>*).

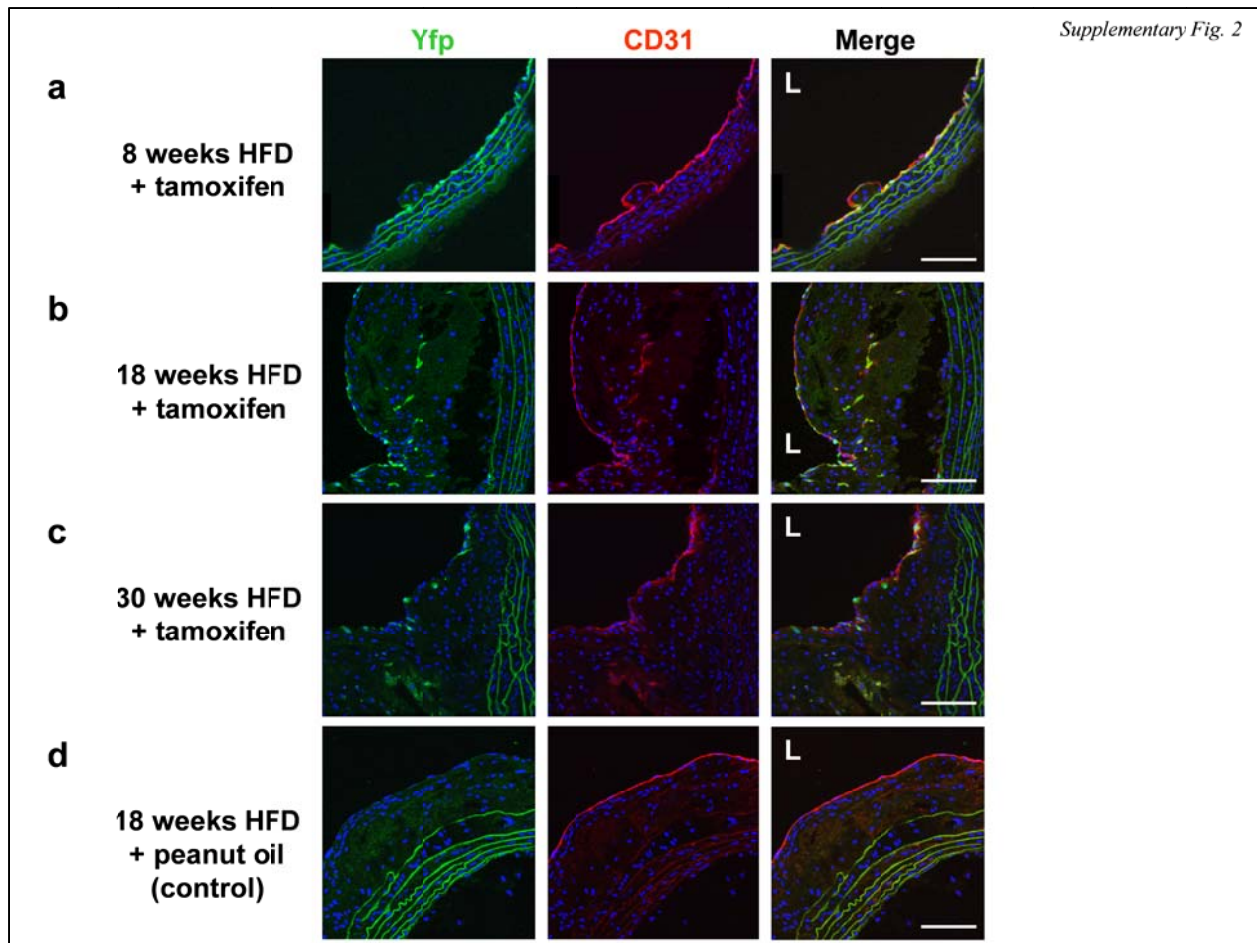

**Supplementary Fig. 2. Sensitivity and specificity of end.*ScfCreER<sup>T</sup>*;R26RstopYfp;ApoE<sup>-/-</sup> endothelial cell fate tracking model. (a - c)** Immunofluorescence staining for Yfp and CD31 performed on thoracic aortic sections from tamoxifen-induced end.*ScfCreERT*;R26RstopYfp;ApoE<sup>-/-</sup> mice after 8, 18 or 30 weeks of HFD (corresponding to 14, 24 or 36 weeks of age). L = lumen; scale bars represent 100  $\mu$ m. **(d)** Immunofluorescence staining for Yfp and CD31, acquired using identical microscope settings and staining protocol, performed on thoracic aortic sections from a control mouse that received peanut oil and after 18 weeks of HFD. L = lumen; scale bars represent 100  $\mu$ m.

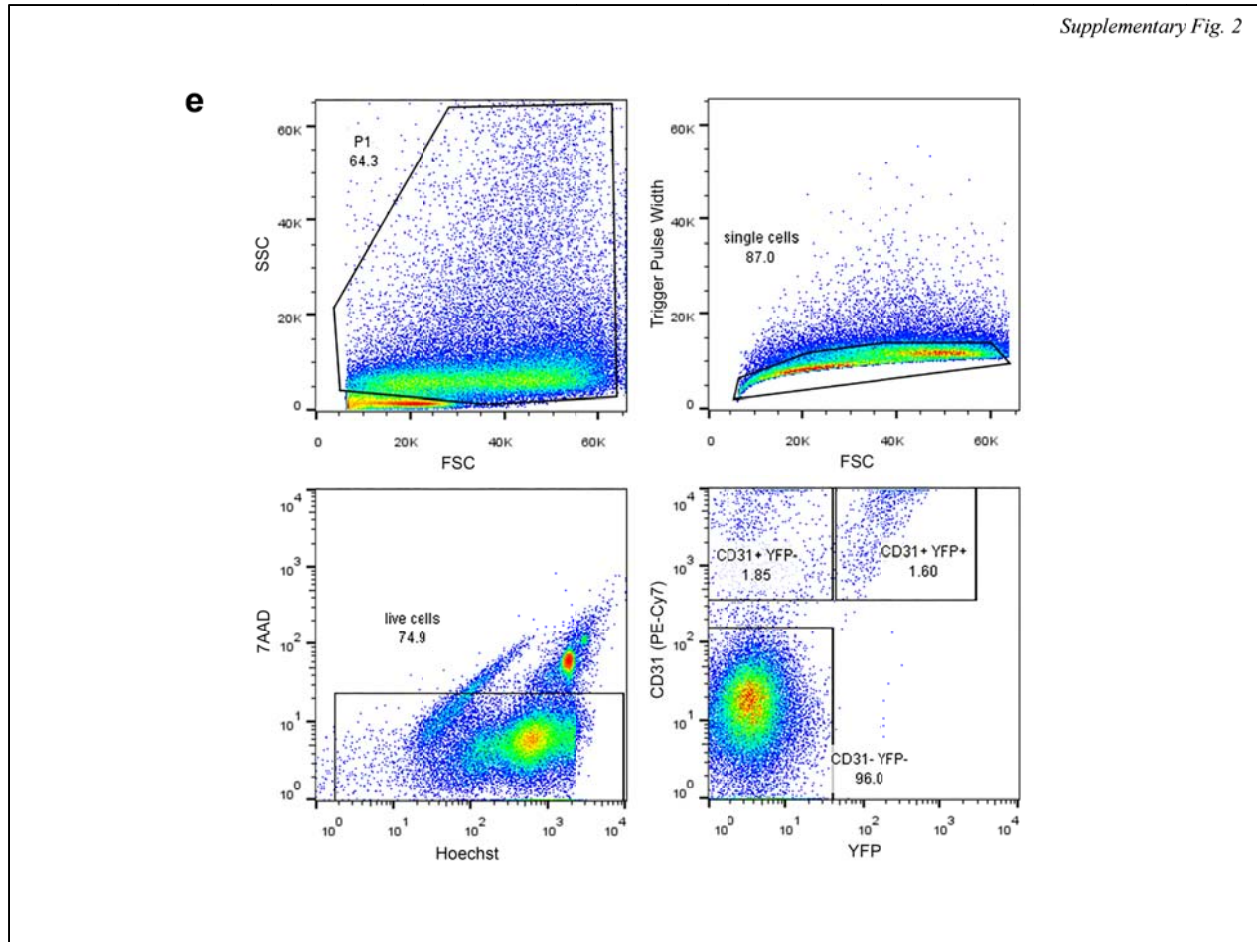

**Supplementary Fig. 2 (continued).** (e) Representative FACS plots demonstrating the gating scheme and results for the determination of the proportion of CD31<sup>+</sup> cells expressing Yfp in end.*ScfCreERT;R26RstopYfp;ApoE<sup>-/-</sup>* mice after 8 weeks of HFD. Cell selection was first based on forward (FSC) and side scatter (SSC) (upper left panel), then we selected the single cell fraction (upper right panel), then live cells by gating for Hoechst 33342 positive and 7AAD negative cells (lower left panel). Following this selection, the lower right panel shows the percentage of CD31<sup>+</sup> cells labeled with anti-CD31 PE-Cy7 antibody and the proportion of CD31<sup>+</sup> cells expressing Yfp.

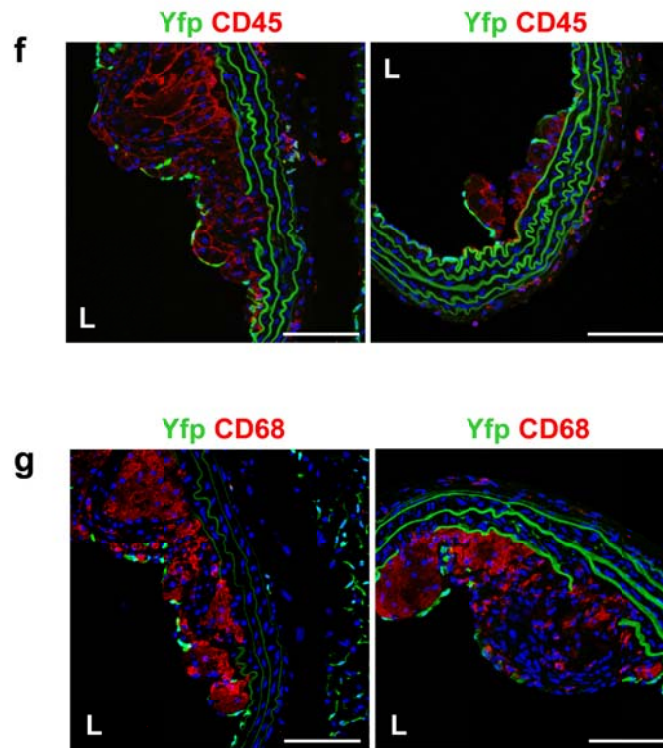

**Supplementary Fig. 2 (continued).** (f) Immunofluorescence staining for Yfp and CD45, or (g) Yfp and CD68, did not reveal any co-positive cells at any time-point. Shown here is staining of mice after 18 weeks of HFD. L = lumen; scale bars represent 100  $\mu$ m.

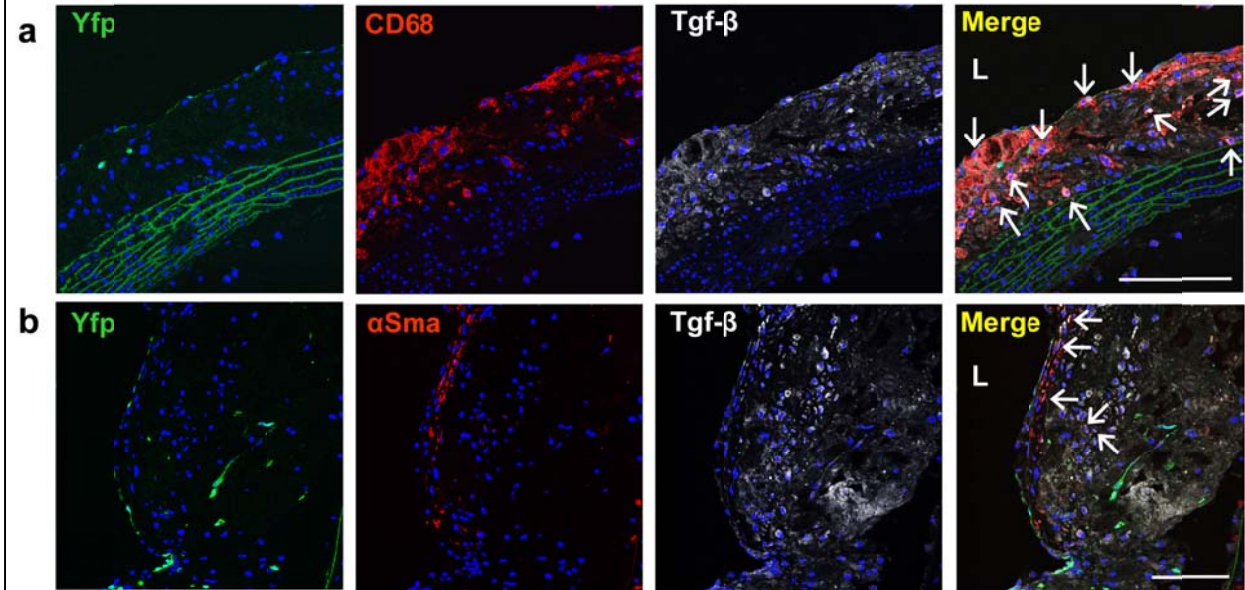

**Supplementary Fig. 3. Tgf- $\beta$  expression in atherosclerotic plaques from *end.ScICreER<sup>T</sup>;R26RstopYfp;ApoE<sup>-/-</sup>* mice. (a) Immunofluorescence staining showing Tgf- $\beta$  expression by CD68<sup>+</sup> macrophages in atherosclerotic plaque. (b) Immunofluorescence staining showing Tgf- $\beta$  expression by  $\alpha$ Sma<sup>+</sup> cells in atherosclerotic plaque. Sections shown are from mice that received 18 weeks of HFD. L = lumen; scale bars represent 100  $\mu$ m. Arrows indicate co-positive cells.**



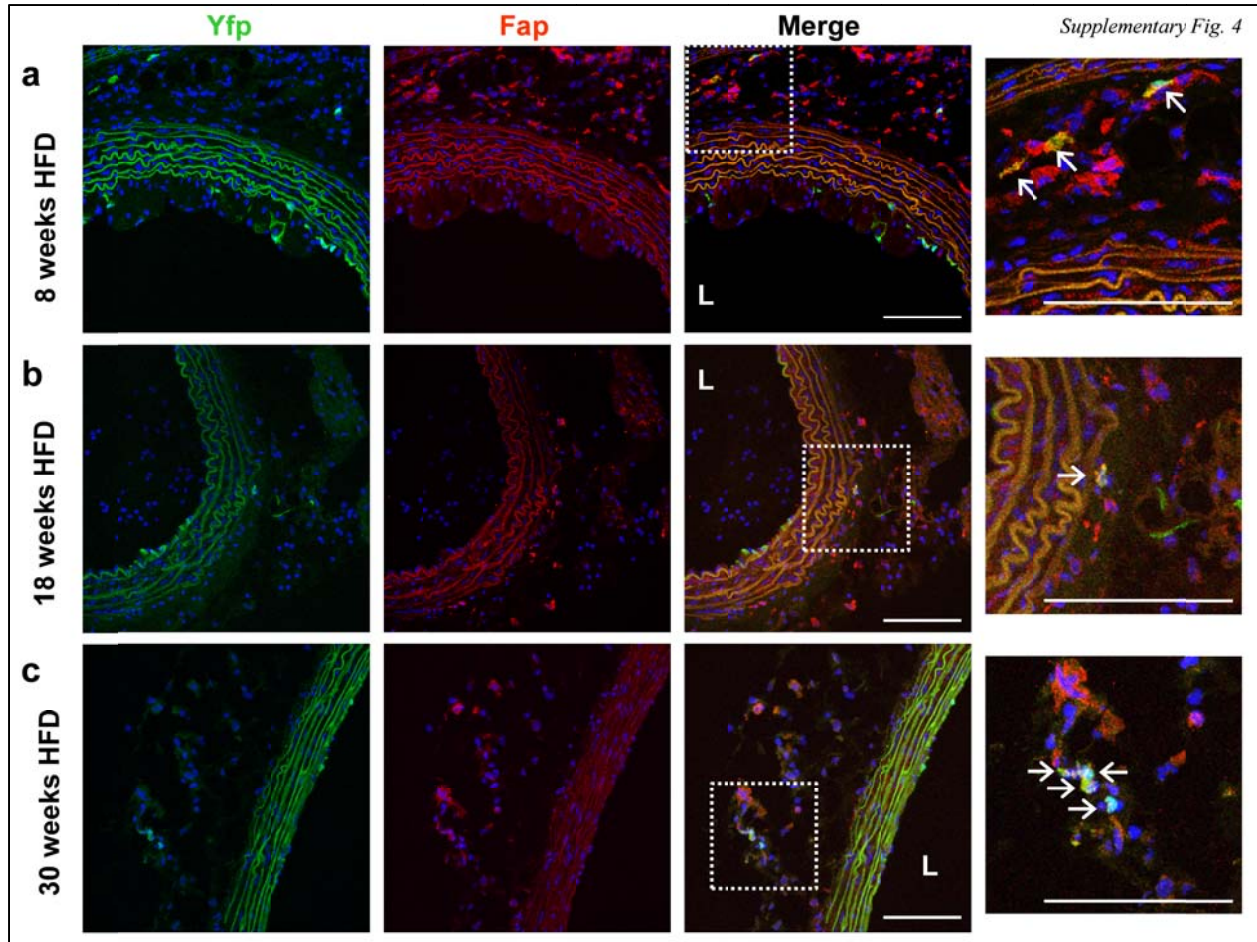

**Supplementary Fig. 4. Endothelial lineage-derived cells undergo EndMT and give rise to  $Fap^+$  fibroblast-like cells within the adventitia. (a – c)** Immunofluorescence confocal microscopy of thoracic aortic sections from tamoxifen-induced *end.Sc1CreER<sup>T</sup>;R26RstopYfp;ApoE<sup>-/-</sup>* mice fed with **(a)** 8, **(b)** 18 or **(c)** 30 weeks of HFD revealed adventitial  $Yfp^+$  cells co-expressing the fibroblast-specific marker  $Fap$ . L = lumen; scale bars represent 100  $\mu$ m. Insets are shown at higher magnification as indicated and arrows indicate co-positive cells.

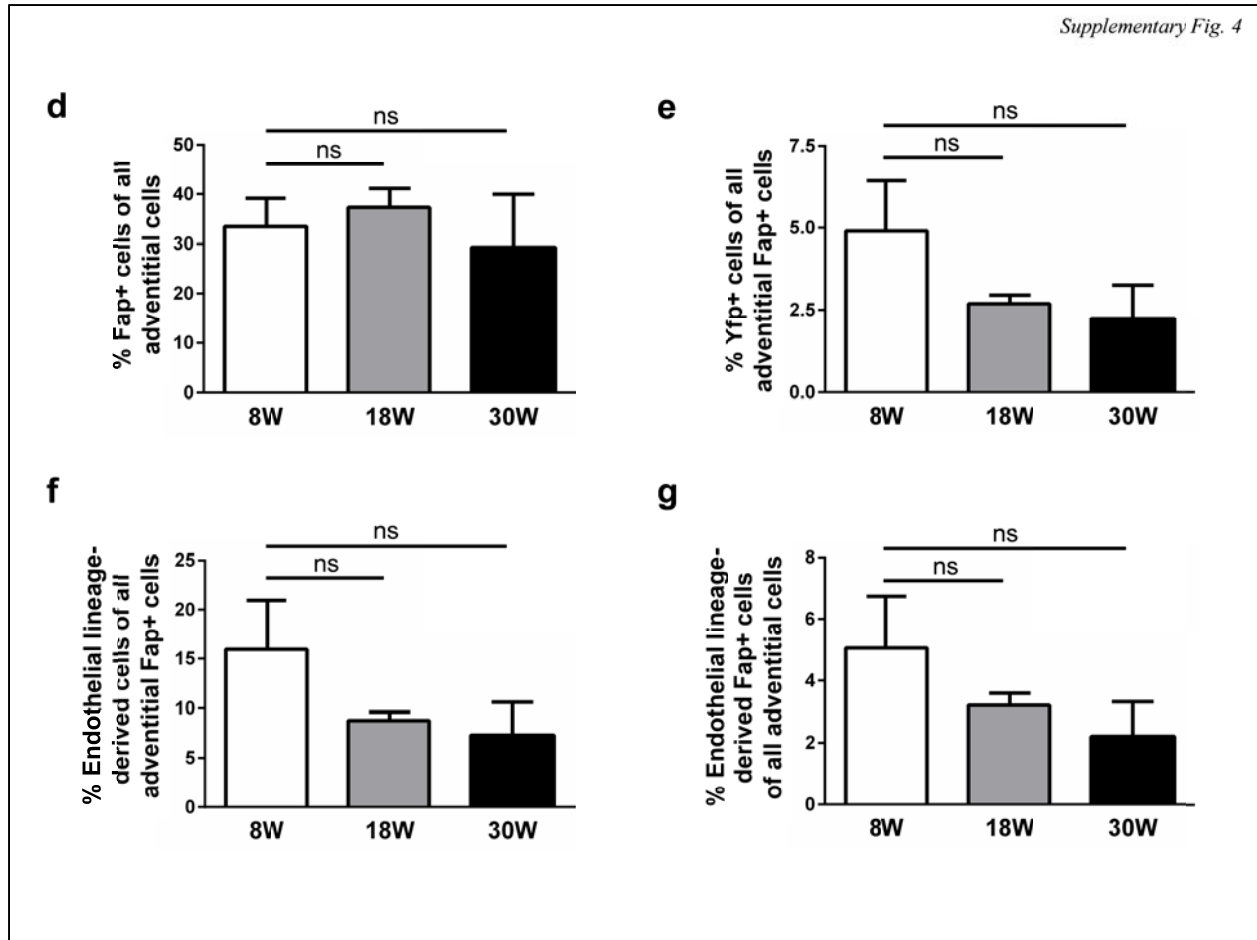

**Supplementary Fig. 4 (continued).** **(d)** Quantitation of adventitial cells revealed that after 8, 18 and 30 weeks of HFD  $33.4 \pm 5.7\%$ ,  $37.3 \pm 3.8\%$  and  $29.3 \pm 10.7\%$  (respectively) of cells expressed Fap. **(e)** Quantitation (not accounting for the % of endothelial cells expressing Yfp) identified that after the abovementioned periods of HFD  $4.9 \pm 1.5\%$ ,  $2.7 \pm 0.3\%$  and  $2.2 \pm 1.0\%$  (respectively) of adventitial Fap<sup>+</sup> cells co-expressed Yfp. **(f)** After taking into account the efficiency of our endothelial lineage tracking system (the % of endothelial cells expressing Yfp), at the same time-points respectively,  $15.9 \pm 5.0\%$ ,  $8.8 \pm 0.8\%$  and  $7.3 \pm 3.3\%$  of adventitial Fap<sup>+</sup> cells were derived from endothelial lineage cells. **(g)** Again taking into account the efficiency of our endothelial lineage tracking system, at the same time-points respectively, we determined that  $5.1 \pm 1.7\%$ ,  $3.2 \pm 0.4\%$  and  $2.2 \pm 1.1\%$  of all adventitial cells were endothelial lineage-derived Fap<sup>+</sup> cells. Staining was performed at each time-point with at least 4 images evaluated from each of at least 3 spatially separated thoracic aortic sections per mouse ( $n = 5$  mice for 8 and 18 weeks;  $n = 4$  mice for 30 weeks). Data were averaged per animal then used for statistical analyses. Analysis by 1-way ANOVA.

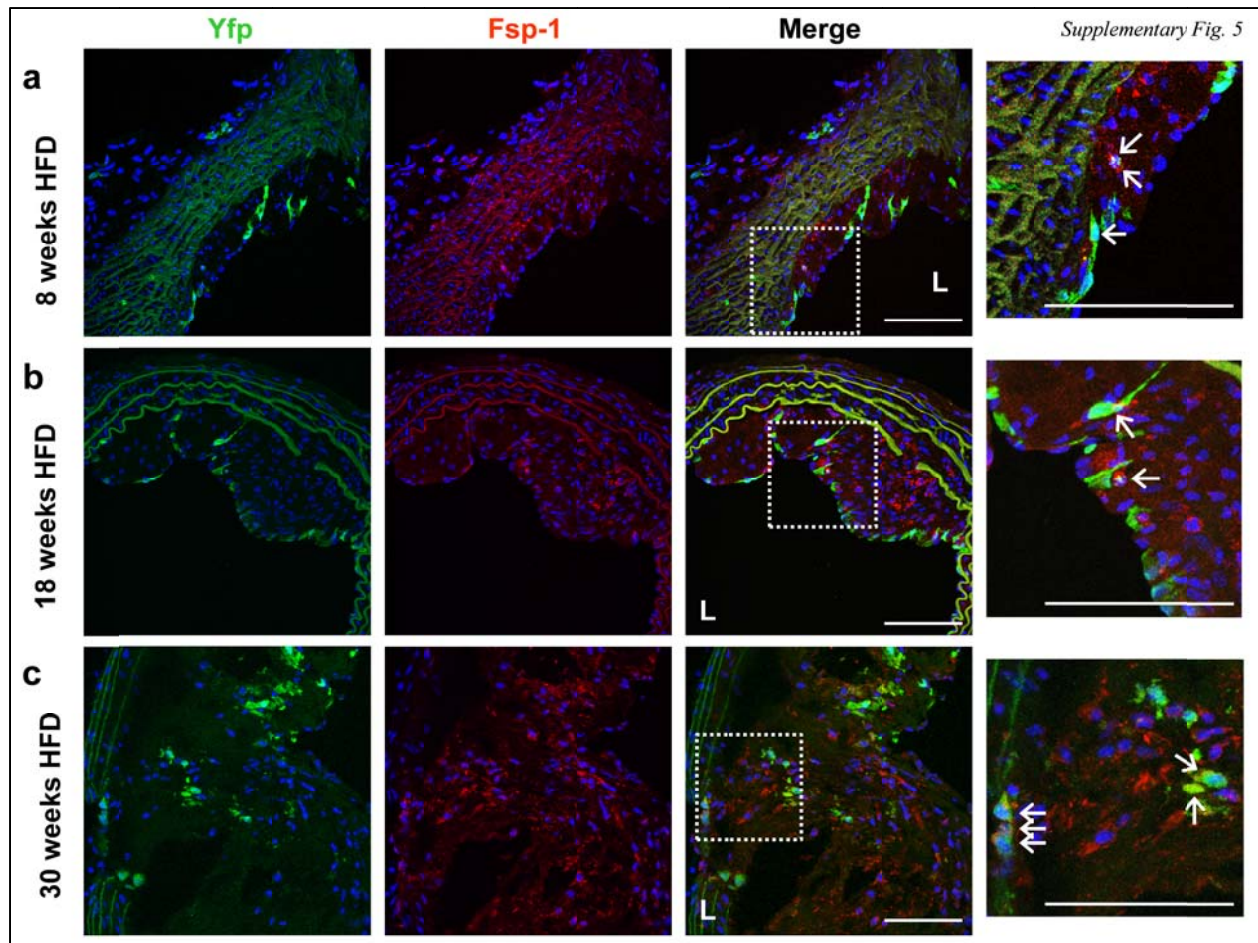

**Supplementary Fig. 5. Endothelial lineage-derived cells undergo EndMT and give rise to Fsp-1<sup>+</sup> fibroblast-like cells within the intima and adventitia.** (a – c) Immunofluorescence confocal microscopy of thoracic aortic sections from tamoxifen-induced end.*ScfCreER<sup>T</sup>*; *R26RstopYfp*; *ApoE<sup>-/-</sup>* mice fed with (a) 8, (b) 18 or (c) 30 weeks of HFD revealed Yfp<sup>+</sup> cells co-expressing the fibroblast marker Fsp-1 within intimal plaques. L = lumen; scale bars represent 100  $\mu$ m. Insets are shown at higher magnification as indicated and arrows indicate co-positive cells.



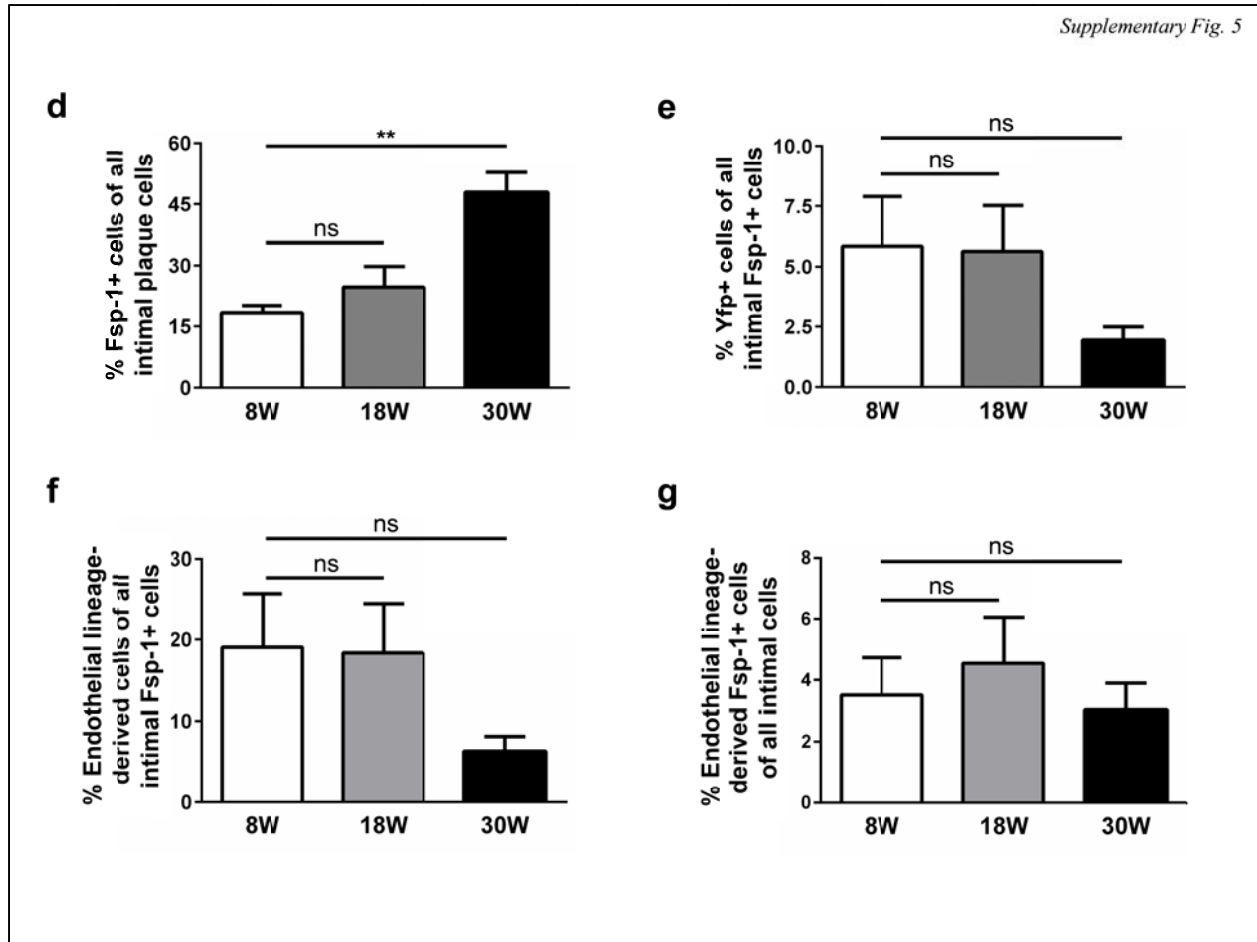

**Supplementary Fig. 5 (continued).** **(d)** Quantitation of cells in intimal plaques revealed that after 8, 18 and 30 weeks of HFD  $18.4 \pm 1.8\%$ ,  $24.7 \pm 5.0\%$  and  $47.9 \pm 4.9\%$  (respectively) of cells expressed Fsp-1, indicative of a fibroblast phenotype. **(e)** Quantitation (not accounting for the proportion of endothelial cells expressing Yfp) identified that after the abovementioned periods of HFD  $5.9 \pm 2.0\%$ ,  $5.6 \pm 1.9\%$  and  $1.9 \pm 0.6\%$  (respectively) of intimal Fsp-1<sup>+</sup> cells co-expressed Yfp. **(f)** After taking into account the efficiency of our endothelial lineage tracking system (the % of endothelial cells expressing Yfp), at the same time-points, we determined that  $19.1 \pm 6.7\%$ ,  $18.4 \pm 6.1\%$  and  $6.3 \pm 1.8\%$  of intimal Fsp-1<sup>+</sup> cells were derived from endothelial lineage cells. **(g)** Again taking into account the efficiency of our endothelial lineage tracking system, at the same time-points respectively, we determined that  $3.5 \pm 1.2\%$ ,  $4.5 \pm 1.5\%$  and  $3.0 \pm 0.9\%$  of all intimal cells were endothelial lineage-derived Fsp-1<sup>+</sup> cells. Staining was performed at each time-point with at least 4 images evaluated from each of at least 3 spatially separated thoracic aortic sections per mouse ( $n = 5$  mice for 8 and 18 weeks;  $n = 4$  mice for 30 weeks). Data were averaged per animal then used for statistical analyses. Analysis by 1-way ANOVA. **\*\*** $P < 0.01$ .

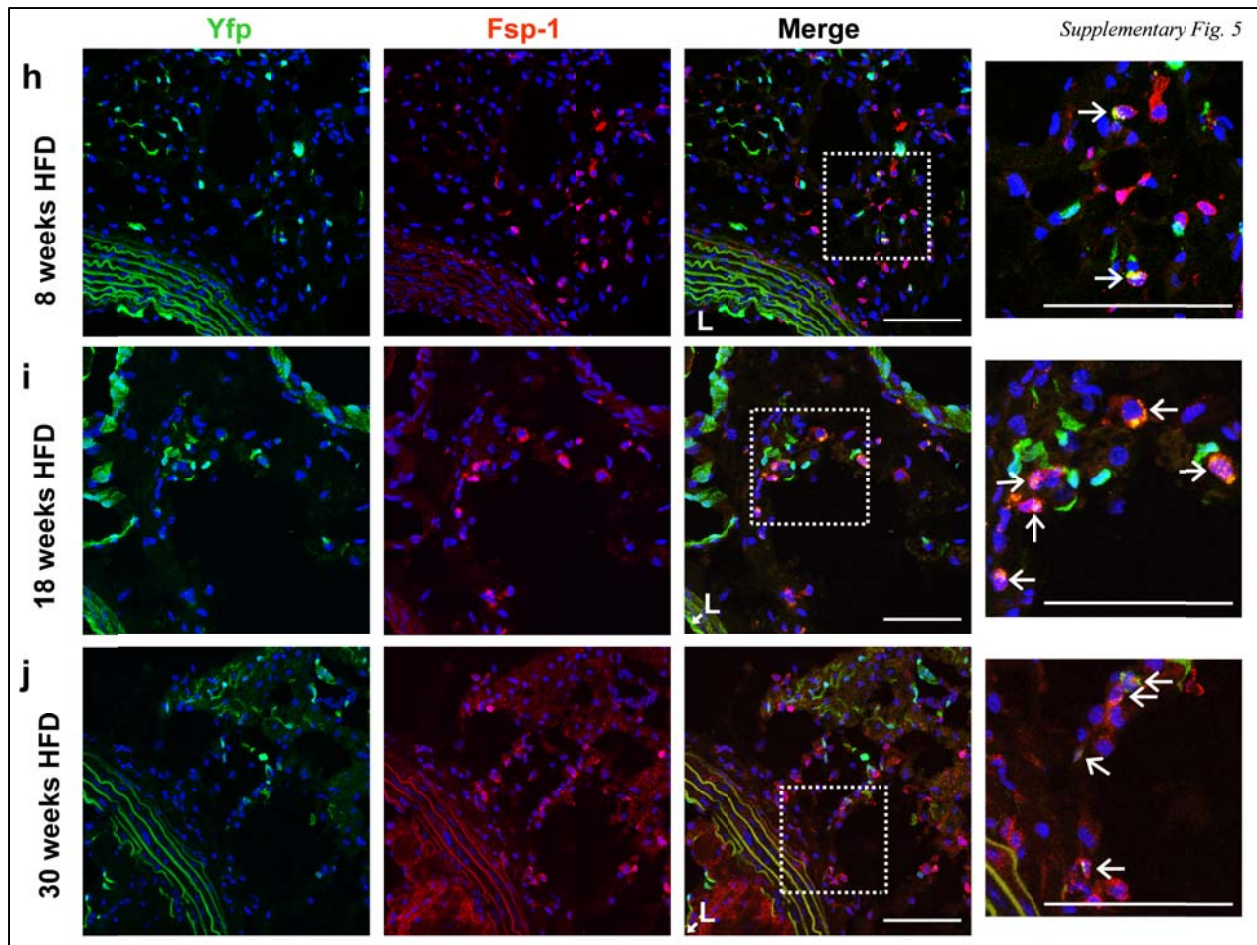

**Supplementary Fig. 5 (continued).** (h – j) Immunofluorescence confocal microscopy of the adventitia from thoracic aortic sections of tamoxifen-induced *end.SclCreER<sup>T</sup>;R26RstopYfp;ApoE<sup>-/-</sup>* mice fed with (h) 8, (i) 18 or (j) 30 weeks of HFD also revealed *Yfp*<sup>+</sup> cells co-expressing the fibroblast marker *Fsp-1*. L = lumen; scale bars represent 100 μm. Insets are shown at higher magnification as indicated and arrows indicate co-positive cells.

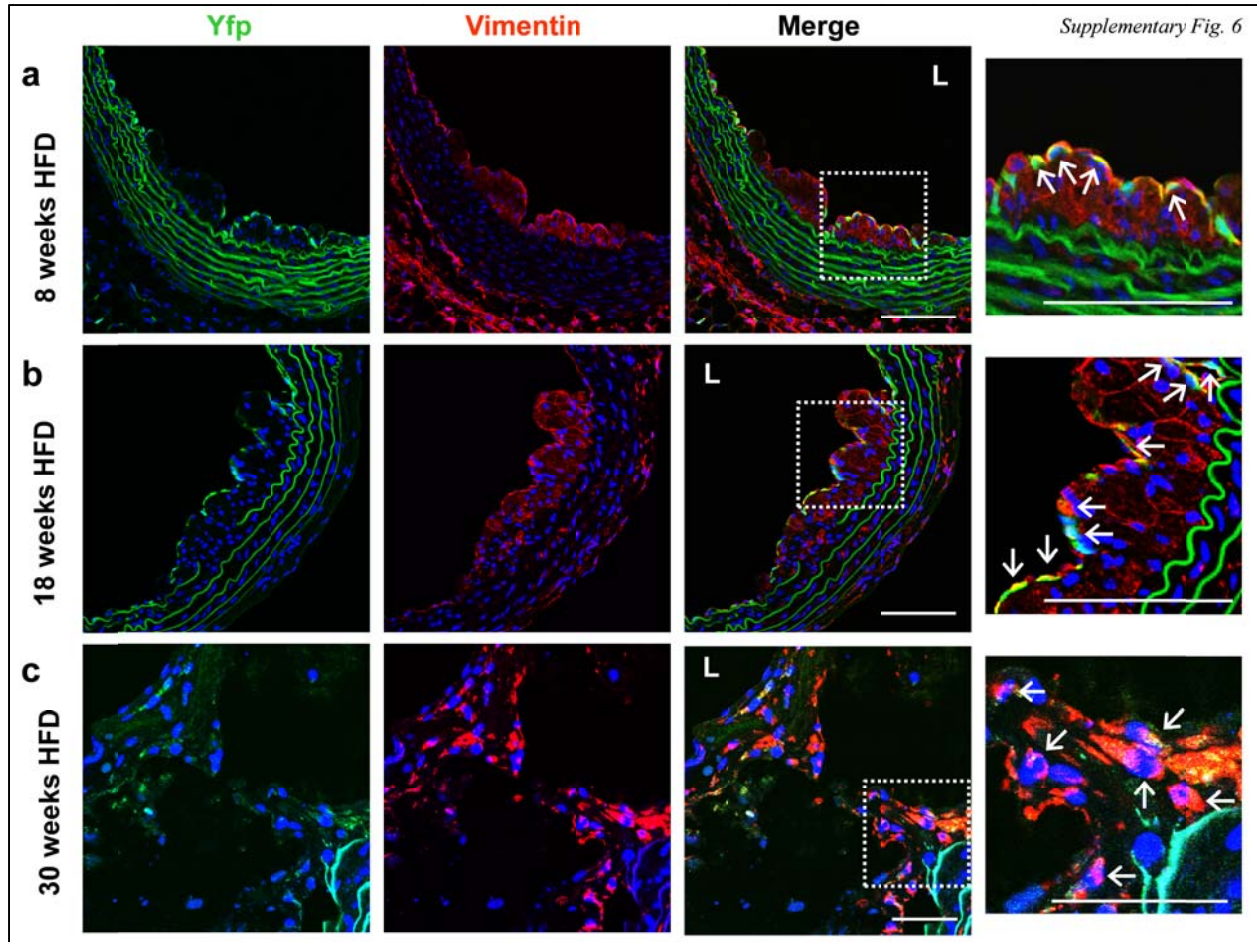

**Supplementary Fig. 6. Endothelial lineage-derived cells undergo EndMT and give rise to Vimentin<sup>+</sup> fibroblast-like cells within the intima and adventitia.** (a – c) Immunofluorescence confocal microscopy of thoracic aortic sections from tamoxifen-induced *end.SclCreER<sup>T</sup>;R26RstopYfp;ApoE<sup>-/-</sup>* mice fed with (a) 8, (b) 18 or (c) 30 weeks of HFD revealed Yfp<sup>+</sup> cells co-expressing the fibroblast marker Vimentin within intimal plaques. L = lumen; scale bars represent 100  $\mu$ m for Supplementary Figs. 6a and b, and 50  $\mu$ m for Supplementary Fig. 6c. Insets are shown at higher magnification as indicated and arrows indicate co-positive cells.

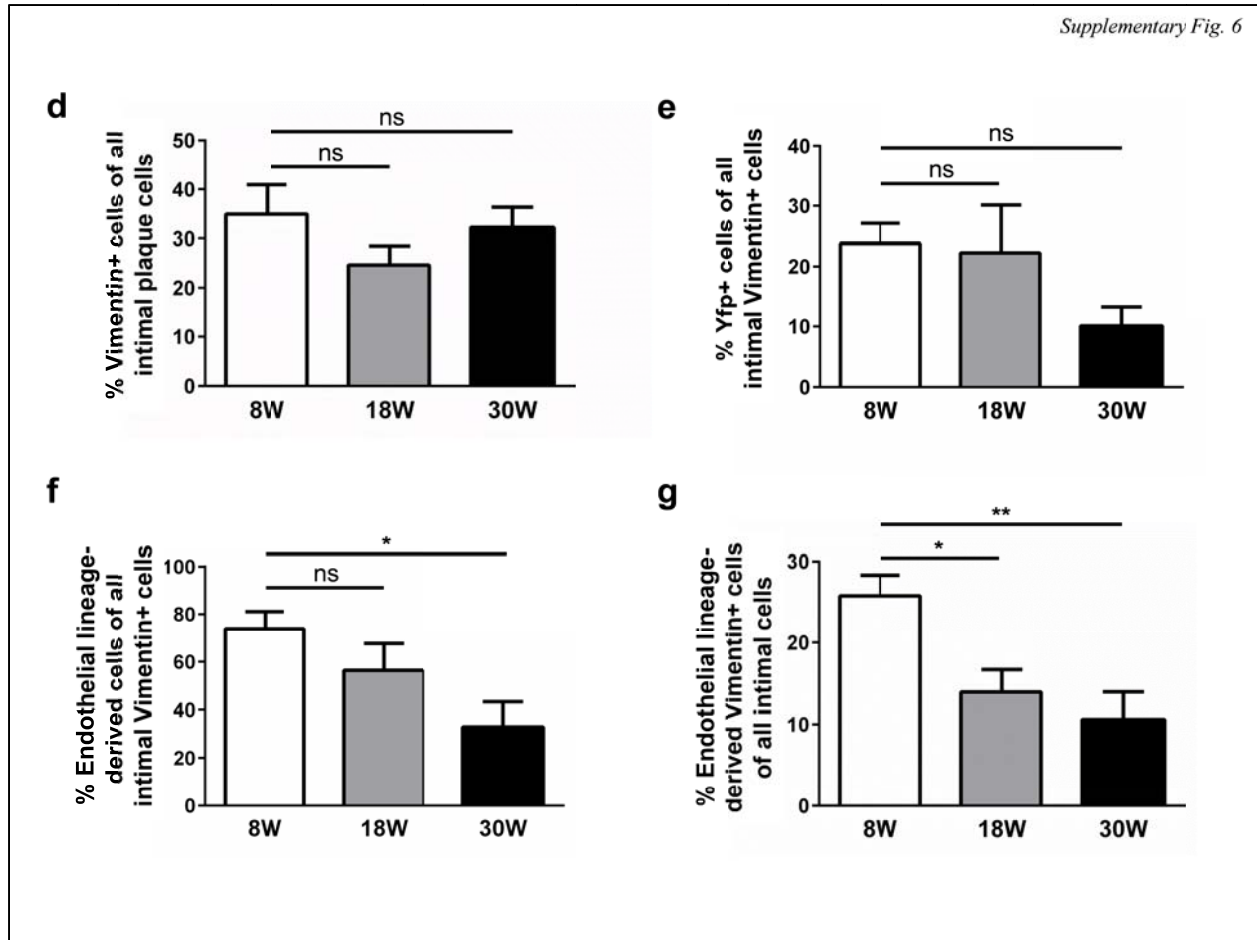

**Supplementary Fig. 6 (continued).** **(d)** Quantitation of cells in intimal plaques revealed that after 8, 18 and 30 weeks of HFD  $34.9 \pm 6.0\%$ ,  $24.7 \pm 3.9\%$  and  $32.2 \pm 4.1\%$  (respectively) of cells expressed Vimentin, indicative of a fibroblast phenotype. **(e)** Quantitation (not accounting for the proportion of endothelial cells expressing Yfp) identified that after the abovementioned periods of HFD  $23.8 \pm 3.3\%$ ,  $22.3 \pm 7.9\%$  and  $10.1 \pm 3.2\%$  (respectively) of intimal Vimentin<sup>+</sup> cells co-expressed Yfp. **(f)** After taking into account the efficiency of our endothelial lineage tracking system (the % of endothelial cells expressing Yfp), at the same time-points, we determined that  $73.8 \pm 7.3\%$ ,  $56.5 \pm 11.2\%$  and  $32.9 \pm 10.4\%$  of intimal Vimentin<sup>+</sup> cells were derived from endothelial lineage cells. **(g)** Again taking into account the efficiency of our endothelial lineage tracking system, at the same time-points respectively, we determined that  $25.8 \pm 2.5\%$ ,  $13.9 \pm 2.8\%$  and  $10.6 \pm 3.4\%$  of all intimal cells were endothelial lineage-derived Vimentin<sup>+</sup> cells. Staining was performed at each time-point with at least 4 images evaluated from each of at least 3 spatially separated thoracic aortic sections per mouse ( $n = 5$  mice for all time-points). Data were averaged per animal then used for statistical analyses. Analysis by 1-way ANOVA.  $**P < 0.01$ .



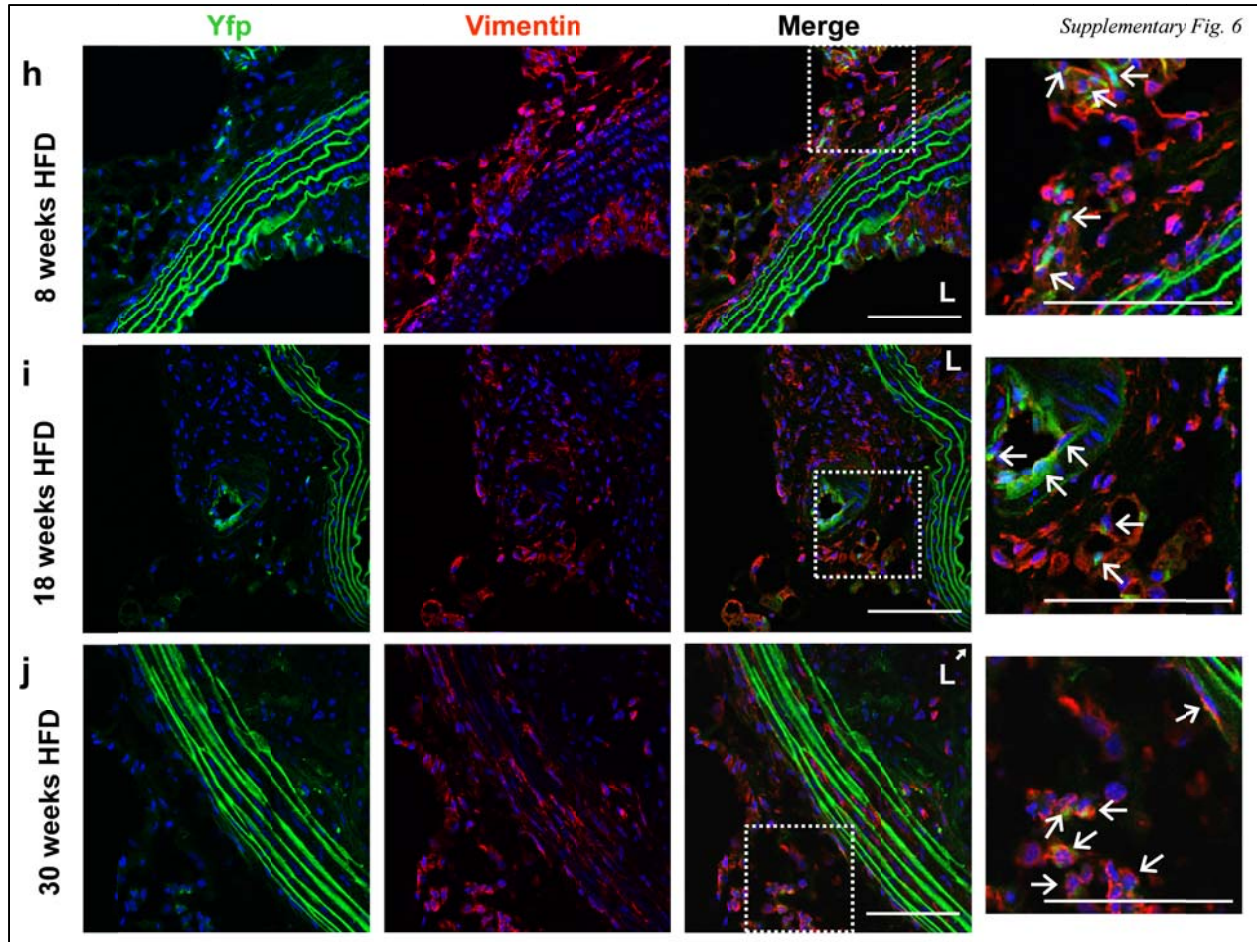

**Supplementary Fig. 6 (continued).** Immunofluorescence confocal microscopy of the adventitia (**h – j**) from thoracic aortic sections of tamoxifen-induced *end.ScICreER<sup>T</sup>;R26RstopYfp;ApoE<sup>-/-</sup>* mice fed with (**h**) 8, (**i**) 18 or (**j**) 30 weeks of HFD also revealed Yfp<sup>+</sup> cells co-expressing the fibroblast marker Vimentin. L = lumen; scale bars represent 100  $\mu$ m. Insets are shown at higher magnification as indicated and arrows indicate co-positive cells.



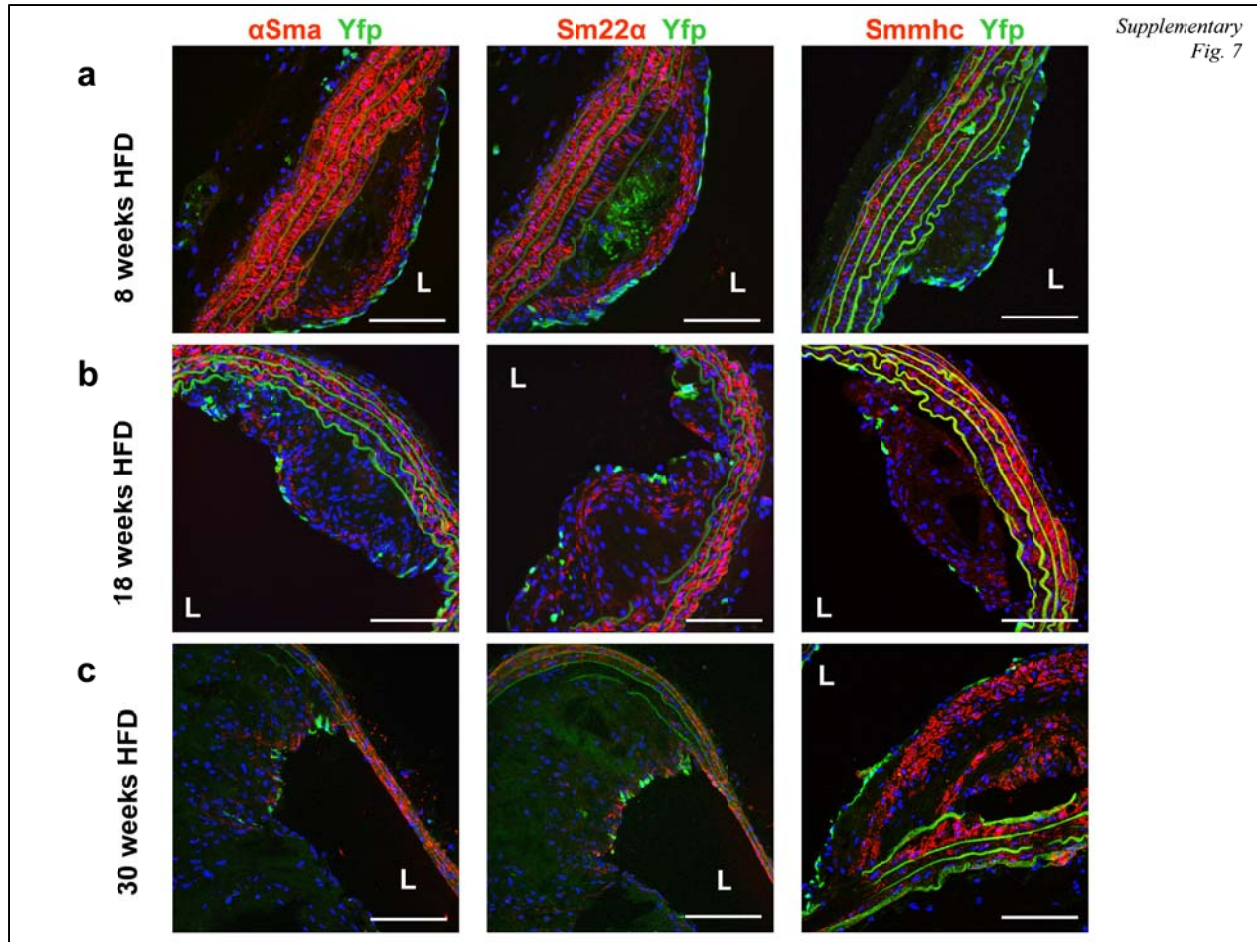

**Supplementary Fig. 7. Endothelial lineage-derived cells give rise to a small proportion of  $\alpha\text{Sma}^+$ ,  $\text{Sm22}\alpha^+$  or  $\text{Smmhc}^+$  cells in murine atherosclerotic lesions. (a – c)** Immunofluorescence confocal microscopy of thoracic aortic sections from tamoxifen-induced *end.SclCreER<sup>T</sup>;R26RstopYfp;ApoE<sup>-/-</sup>* mice fed with (a) 8, (b) 18 or (c) 30 weeks of HFD revealed that  $\text{Yfp}^+$  cells give rise to a small proportion of  $\alpha\text{Sma}^+$ ,  $\text{Sm22}\alpha^+$  or  $\text{Smmhc}^+$  cells in this murine model. L = lumen; scale bars represent 100  $\mu\text{m}$ .

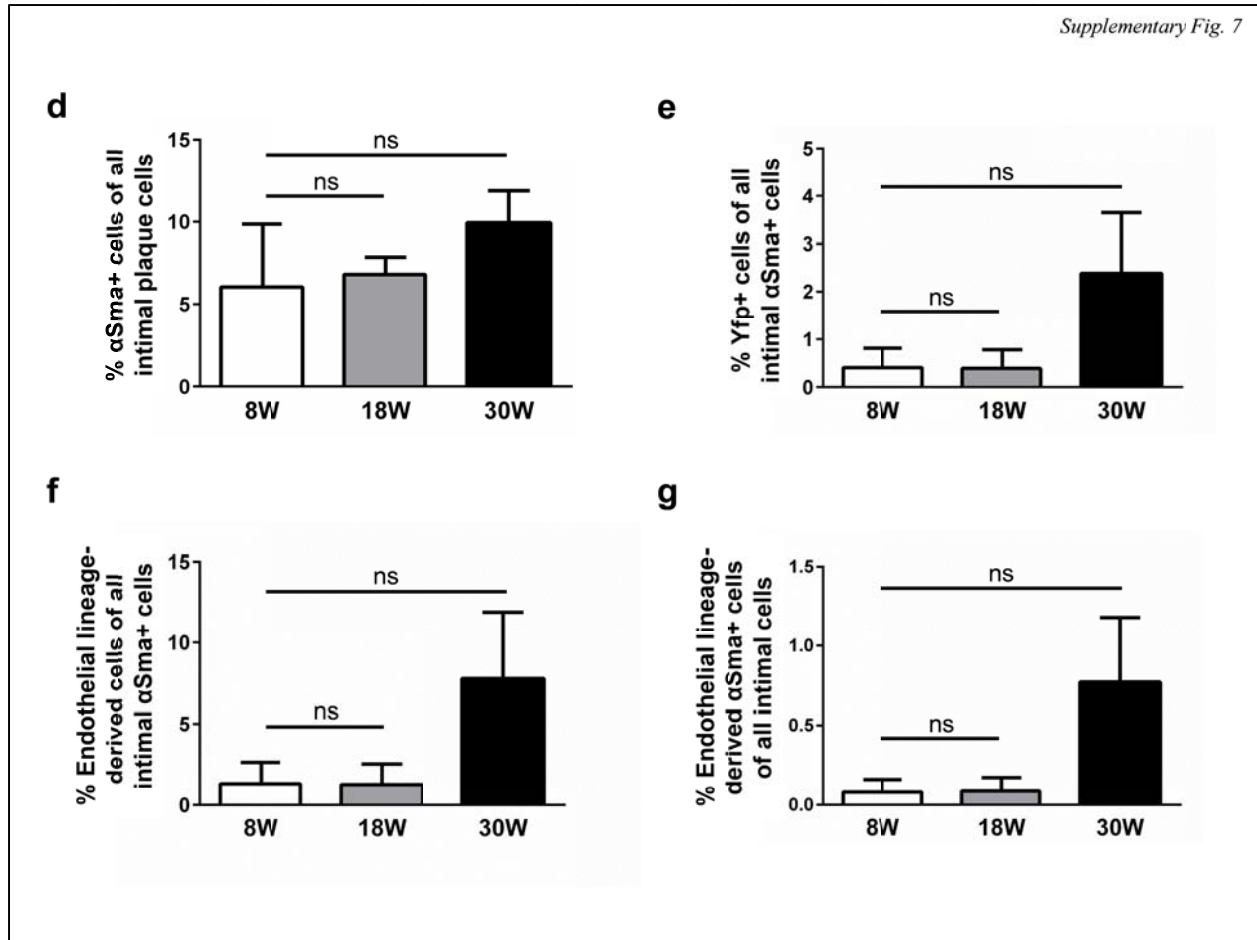

**Supplementary Fig. 7 (continued).** (d) Quantitation of cells in intimal plaques revealed that after 8, 18 and 30 weeks of HFD  $6.1 \pm 3.8\%$ ,  $6.8 \pm 0.8\%$  and  $9.9 \pm 1.7\%$  (respectively) of cells expressed  $\alpha$ Sma. (e) Quantitation (not accounting for the proportion of endothelial cells expressing Yfp) identified that after the abovementioned periods of HFD  $0.4 \pm 0.4\%$ ,  $0.4 \pm 0.3\%$  and  $2.4 \pm 1.1\%$  (respectively) of intimal  $\alpha$ Sma<sup>+</sup> cells co-expressed Yfp. (f) After taking into account the efficiency of our endothelial lineage tracking system (the % of endothelial cells expressing Yfp), at the same time-points, we determined that  $1.3 \pm 1.4\%$ ,  $1.3 \pm 0.9\%$  and  $7.8 \pm 3.7\%$  of intimal  $\alpha$ Sma<sup>+</sup> cells were derived from endothelial lineage cells. (g) Again taking into account the efficiency of our endothelial lineage tracking system, at the same time-points respectively, we determined that  $0.08 \pm 0.09\%$ ,  $0.09 \pm 0.06\%$  and  $0.8 \pm 0.4\%$  of all intimal cells were endothelial lineage-derived  $\alpha$ Sma<sup>+</sup> cells. Staining was performed at each time-point with at least 4 images evaluated from each of at least 3 spatially separated thoracic aortic sections per mouse ( $n = 5$  mice for all time-points). Data were averaged per animal then used for statistical analyses. Analysis by 1-way ANOVA.

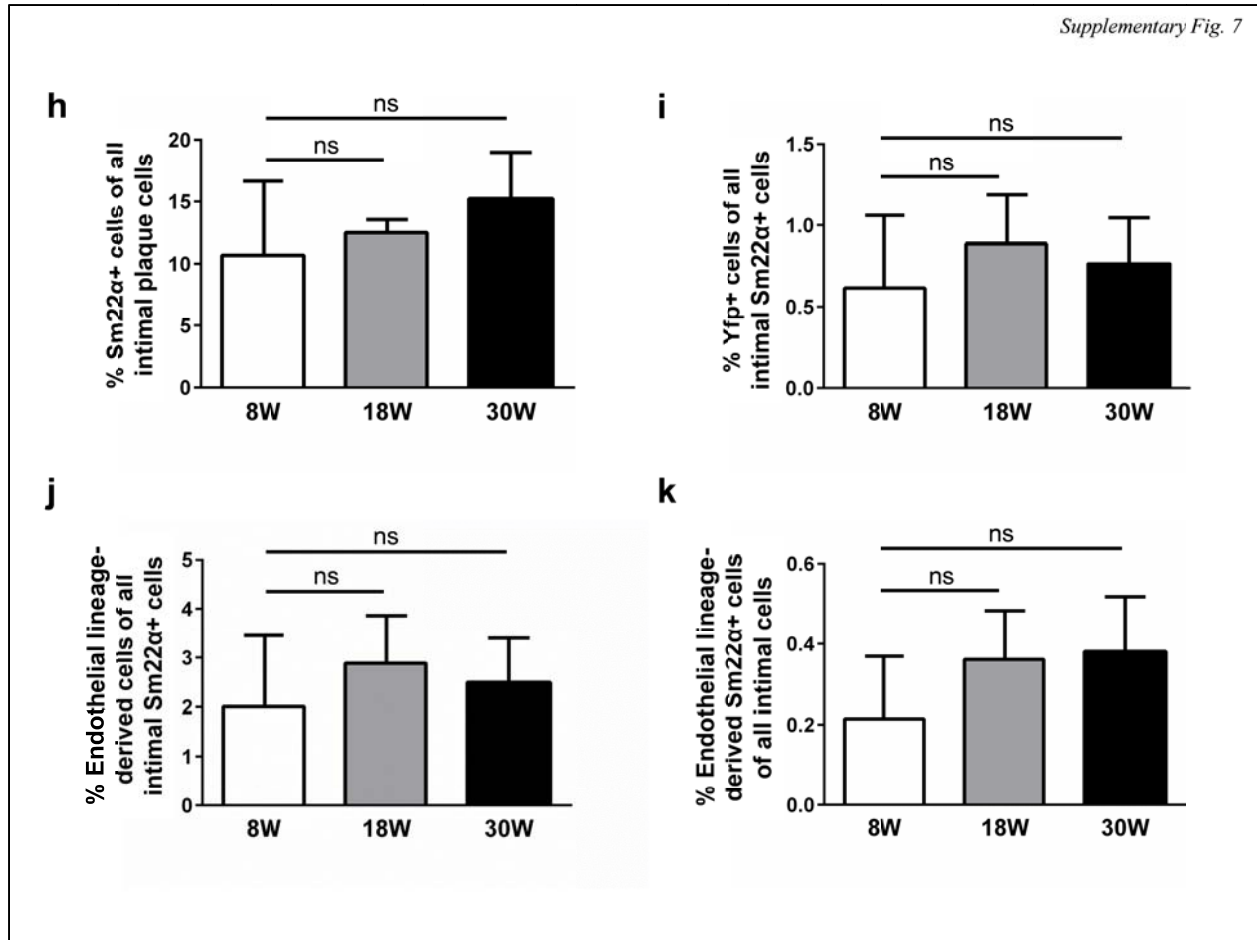

**Supplementary Fig. 7 (continued).** (h) Quantitation of cells in intimal plaques revealed that after 8, 18 and 30 weeks of HFD  $10.7 \pm 5.3\%$ ,  $12.5 \pm 0.8\%$  and  $15.2 \pm 3.4\%$  (respectively) of cells expressed Sm22 $\alpha$ . (i) Quantitation (not accounting for the proportion of endothelial cells expressing Yfp) identified that after the abovementioned periods of HFD  $0.6 \pm 0.4\%$ ,  $0.9 \pm 0.2\%$  and  $0.8 \pm 0.2\%$  (respectively) of intimal Sm22 $\alpha$ <sup>+</sup> cells co-expressed Yfp. (j) After taking into account the efficiency of our endothelial lineage tracking system (the % of endothelial cells expressing Yfp), at the same time-points, we determined that  $2.0 \pm 1.3\%$ ,  $2.9 \pm 0.7\%$  and  $2.5 \pm 0.8\%$  of intimal Sm22 $\alpha$ <sup>+</sup> cells were derived from endothelial lineage cells. (k) Again taking into account the efficiency of our endothelial lineage tracking system, at the same time-points respectively, we determined that  $0.2 \pm 0.1\%$ ,  $0.4 \pm 0.08\%$  and  $0.4 \pm 0.1\%$  of all intimal cells were endothelial lineage-derived Sm22 $\alpha$ <sup>+</sup> cells. Staining was performed at each time-point with at least 4 images evaluated from each of at least 3 spatially separated thoracic aortic sections per mouse ( $n = 5$  mice for all time-points). Data were averaged per animal then used for statistical analyses. Analysis by 1-way ANOVA.

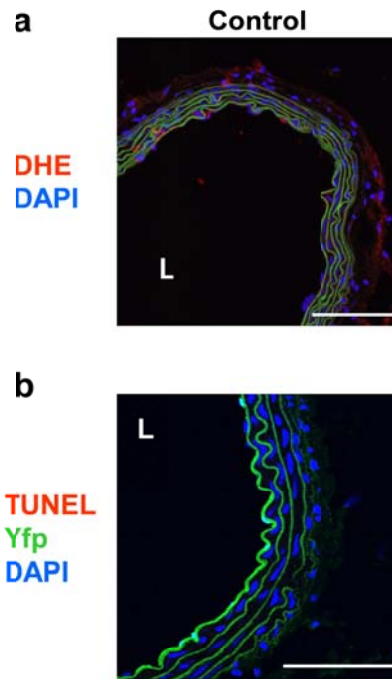

**Supplementary Fig. 8. Lack of oxidative stress and cell apoptosis in non-atherosclerotic (control) vessels.** Control *end.Sc1CreER<sup>T</sup>;R26RstopYfp;ApoE<sup>-/-</sup>* mice of the same age as those shown in Figs. 3a and 3b, fed a chow diet, were stained with the identical DHE (**a**) and TUNEL (**b**) staining protocols as per Figs. 3a and 3b. No appreciable signal was seen for either DHE or TUNEL staining in these samples. L = lumen; scale bars represent 100  $\mu$ m.

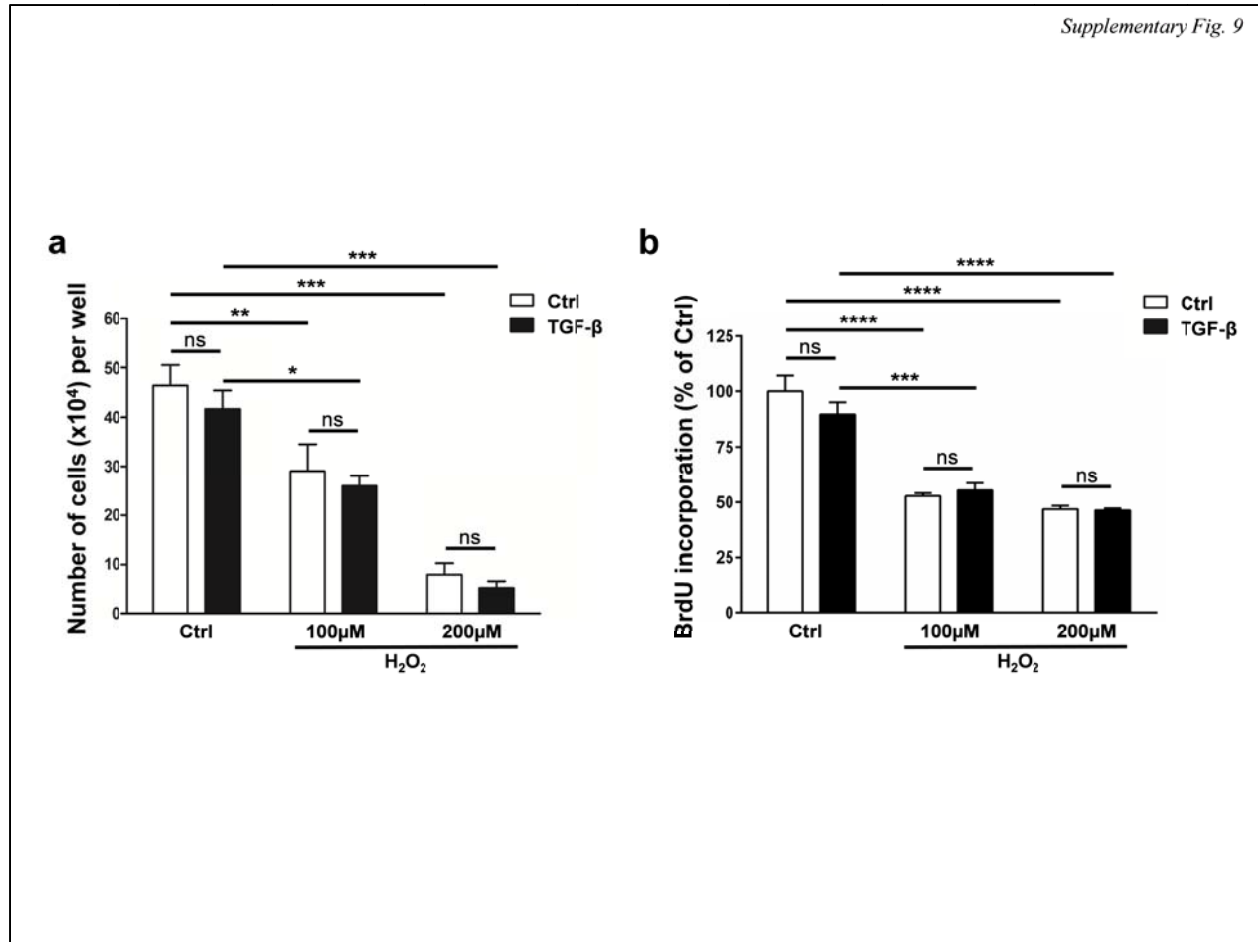

**Supplementary Fig. 9. Cellular effects of TGF- $\beta$  and H<sub>2</sub>O<sub>2</sub> on HUVECs. (a)** At the described doses used to induce EndMT, TGF- $\beta$  did not affect the total number of cells in culture (per well of 6-well culture plate), while H<sub>2</sub>O<sub>2</sub> caused a dose-responsive reduction in cell count during EndMT induction over 5 days.  $n = 3$  per condition. **(b)** Cell proliferation assessed by BrdU incorporation during the initial 24 hours of EndMT induction was unchanged by TGF- $\beta$ , while H<sub>2</sub>O<sub>2</sub> caused a dose-responsive reduction in cell proliferation.  $n = 3$  per condition. Data in Supplementary Fig. 9 were analyzed by 2-way ANOVA with complete results presented in Supplementary Table 1. ns not significant, \* $P < 0.05$ , \*\* $P < 0.01$ , \*\*\* $P < 0.001$ , \*\*\*\* $P < 0.0001$ .



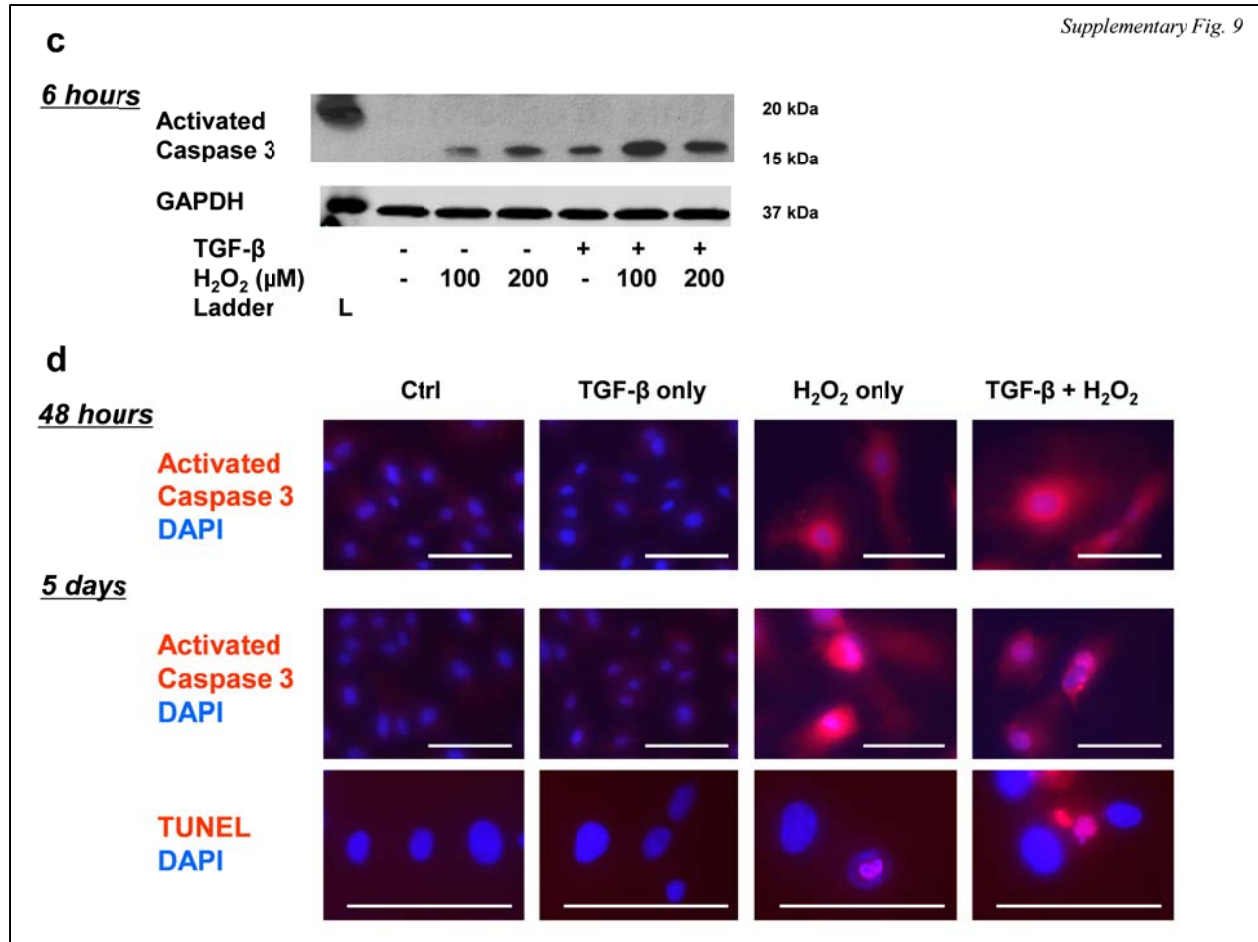

**Supplementary Fig. 9 (continued).** (c) Endothelial cell apoptosis in response to 6 hours EndMT induction assessed by Western blot for activated Caspase 3 protein expression in HUVECs with H<sub>2</sub>O<sub>2</sub> applied at the indicated concentrations. Activated Caspase 3 ladder (L) represents 20kDa. Activated Caspase 3 expected molecular weight/size is 17kDa. GAPDH ladder represents 37kDa. GAPDH expected molecular weight/size is 37kDa. (d) Endothelial cell apoptosis in response to EndMT induction in HUVECs assessed by immunostaining for active Caspase 3 (after 48 hours and 5 days EndMT induction) and TUNEL (5 days EndMT induction) following treatment with endothelial growth media alone (Ctrl), TGF- $\beta$  only, 200 $\mu$ M H<sub>2</sub>O<sub>2</sub> only, or TGF- $\beta$  plus 200 $\mu$ M H<sub>2</sub>O<sub>2</sub>. Scale bars represent 100  $\mu$ m.

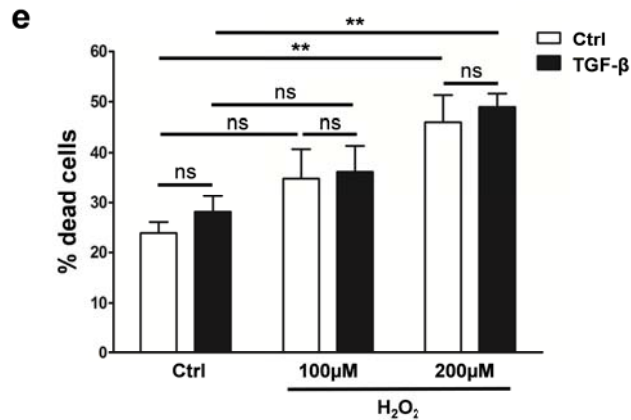

**Supplementary Fig. 9 (continued). (e)** H<sub>2</sub>O<sub>2</sub>, but not TGF-β, increased cell death after 48 hours of EndMT induction.  $n = 4$  per condition. Data in Supplementary Fig. 9 were analyzed by 2-way ANOVA with complete results presented in Supplementary Table 1. ns not significant, \* $P < 0.05$ , \*\* $P < 0.01$ , \*\*\* $P < 0.001$ , \*\*\*\* $P < 0.0001$ . Note that while in other EndMT experiments endothelial cells were treated with TGF-β and/or H<sub>2</sub>O<sub>2</sub> for 5 days, to evaluate the effects of these agents on the EndMT process (rather than resulting mesenchymal cells), experiments b, c, e, and some of d in Supplementary Fig. 9 were performed at earlier time-points as indicated.

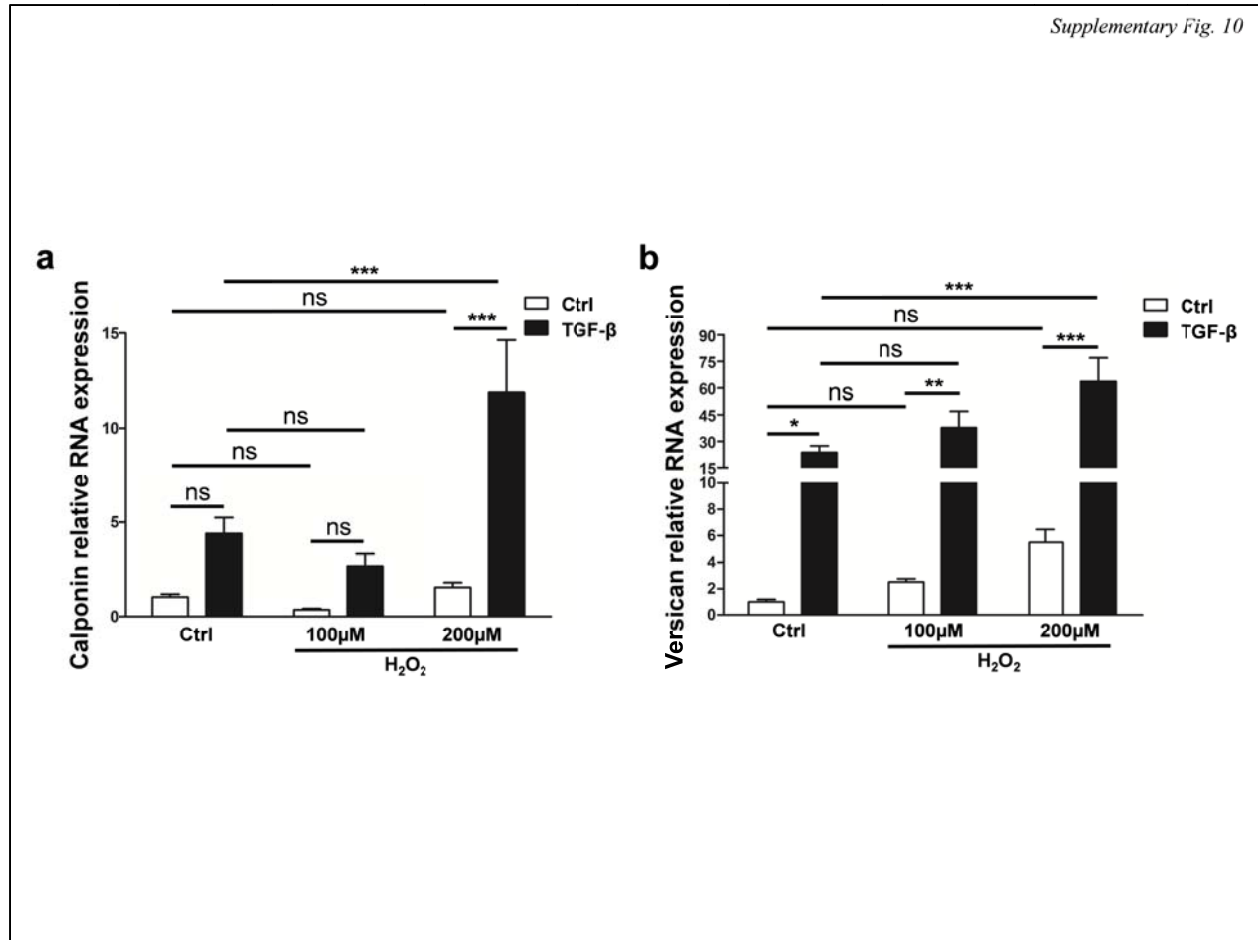

**Supplementary Fig. 10. Oxidative stress augments EndMT and induces TGF- $\beta$  pathway activation in HUVECs. (a, b) Relative RNA expression of Calponin and Versican (respectively) assessed by qRT-PCR was increased by both TGF- $\beta$  and H<sub>2</sub>O<sub>2</sub> in an additive fashion. All experiments in Supplementary Fig. 10 involved induction of EndMT by cell stimulation with TGF- $\beta$  and/or H<sub>2</sub>O<sub>2</sub> over 5 days (see methods). Data in Supplementary Fig. 10 were analyzed by 2-way ANOVA with complete results presented in Supplementary Table 4. ns not significant, \* $P < 0.05$ , \*\* $P < 0.01$ , \*\*\* $P < 0.001$ , \*\*\*\* $P < 0.0001$ .  $n = 6 - 9$  for qRT-PCR.**

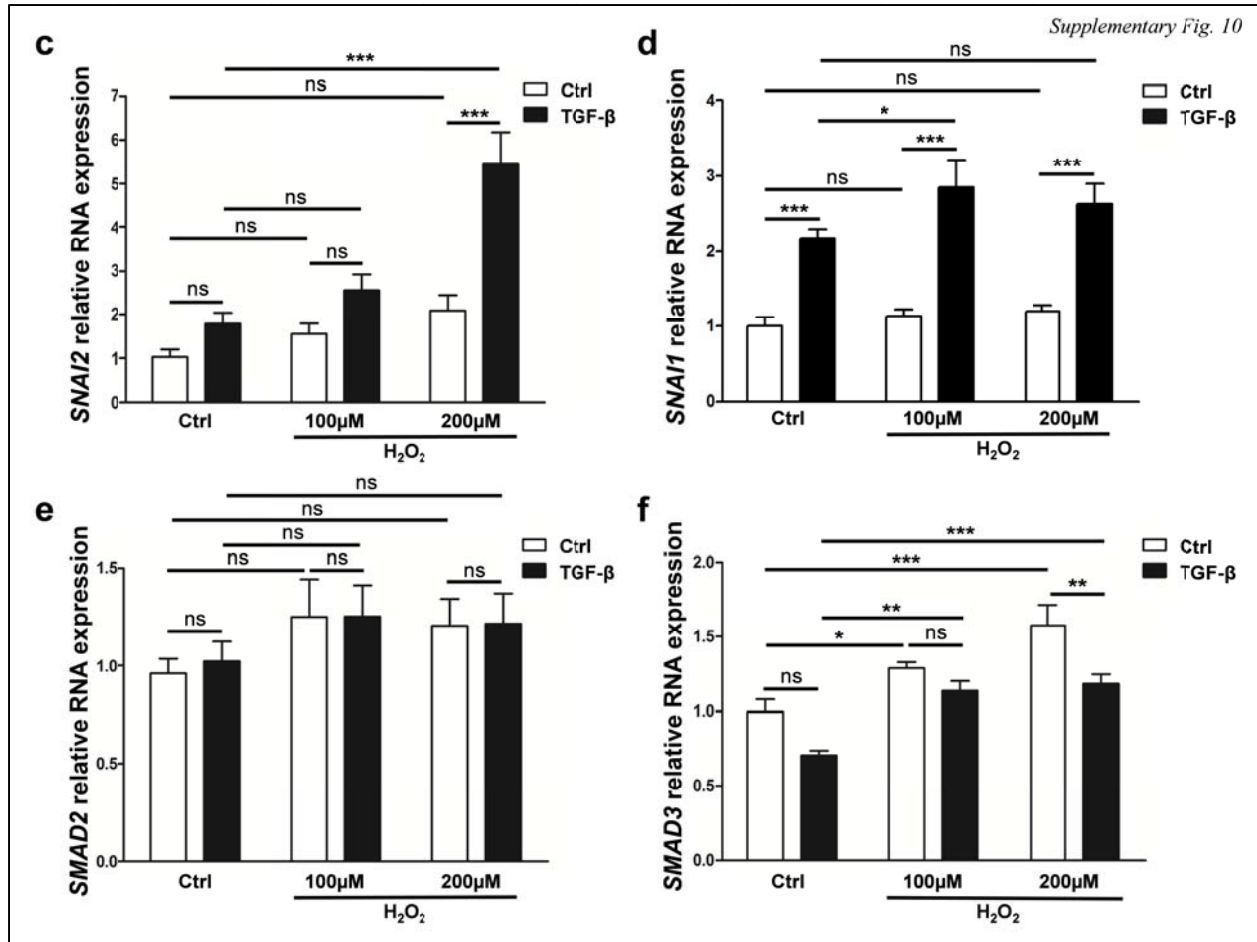

**Supplementary Fig. 10 (continued).** (c) Relative *SNAI2* RNA expression assessed by qRT-PCR was increased by both TGF-β and H<sub>2</sub>O<sub>2</sub> in an additive fashion. (d) *SNAI1* RNA expression was increased by TGF-β, while H<sub>2</sub>O<sub>2</sub> had a marginal effect. (e) *SMAD2* expression was not affected by TGF-β or H<sub>2</sub>O<sub>2</sub>. (f) *SMAD3* RNA expression was increased by H<sub>2</sub>O<sub>2</sub>, but was decreased by TGF-β. All experiments in Supplementary Fig. 10 involved induction of EndMT by cell stimulation with TGF-β and/or H<sub>2</sub>O<sub>2</sub> over 5 days (see methods). Data in Supplementary Fig. 10 were analyzed by 2-way ANOVA with complete results presented in Supplementary Table 4. ns not significant, \**P* < 0.05, \*\**P* < 0.01, \*\*\**P* < 0.001, \*\*\*\**P* < 0.0001. *n* = 6 - 9 for qRT-PCR.

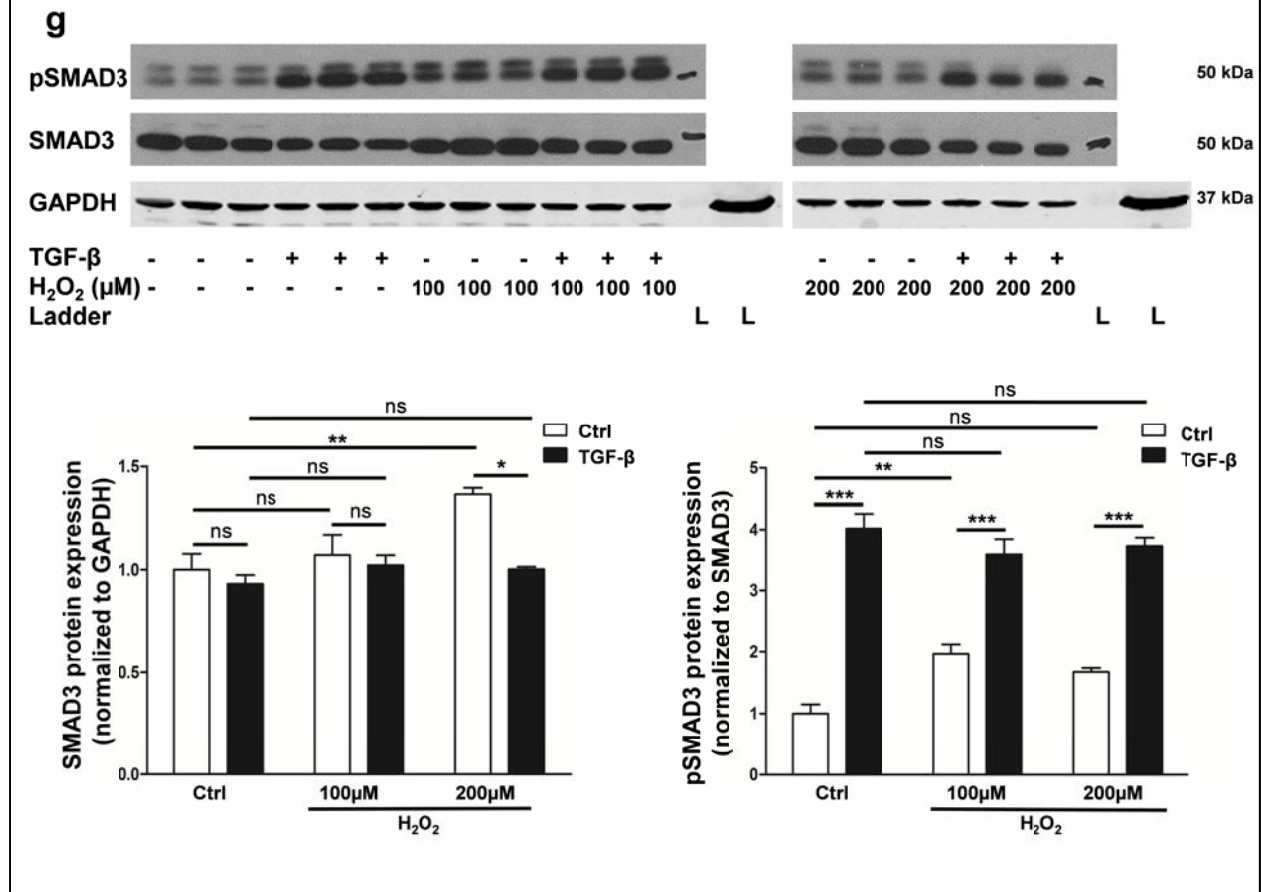

**Supplementary Fig. 10 (continued). (g)** Western blots (above) showing protein expression levels of pSMAD3, SMAD3 and GAPDH on exposure of HUVECs to TGF-β and/or H<sub>2</sub>O<sub>2</sub>. Quantitation (below left) of Western blots for SMAD3 protein levels, showing that H<sub>2</sub>O<sub>2</sub> but not TGF-β increases SMAD3 in HUVECs. Quantitation (below right) of Western blots showing pSMAD3 protein levels (relative to SMAD3), with both TGF-β and H<sub>2</sub>O<sub>2</sub> causing activation of SMAD3. pSMAD3 ladder (L) represents 50kDa. pSMAD3 expected molecular weight/size is 48kDa. SMAD3 ladder (L) represents 50kDa. SMAD3 expected molecular weight/size is 52kDa. GAPDH ladder represents 37kDa. GAPDH expected molecular weight/size is 37kDa. All experiments in Supplementary Fig. 10 involved induction of EndMT by cell stimulation with TGF-β and/or H<sub>2</sub>O<sub>2</sub> over 5 days (see methods). Data in Supplementary Fig. 10 were analyzed by 2-way ANOVA with complete results presented in Supplementary Table 4. ns not significant, \**P* < 0.05, \*\**P* < 0.01, \*\*\**P* < 0.001, \*\*\*\**P* < 0.0001. *n* = 3 - 6 for Western blots.



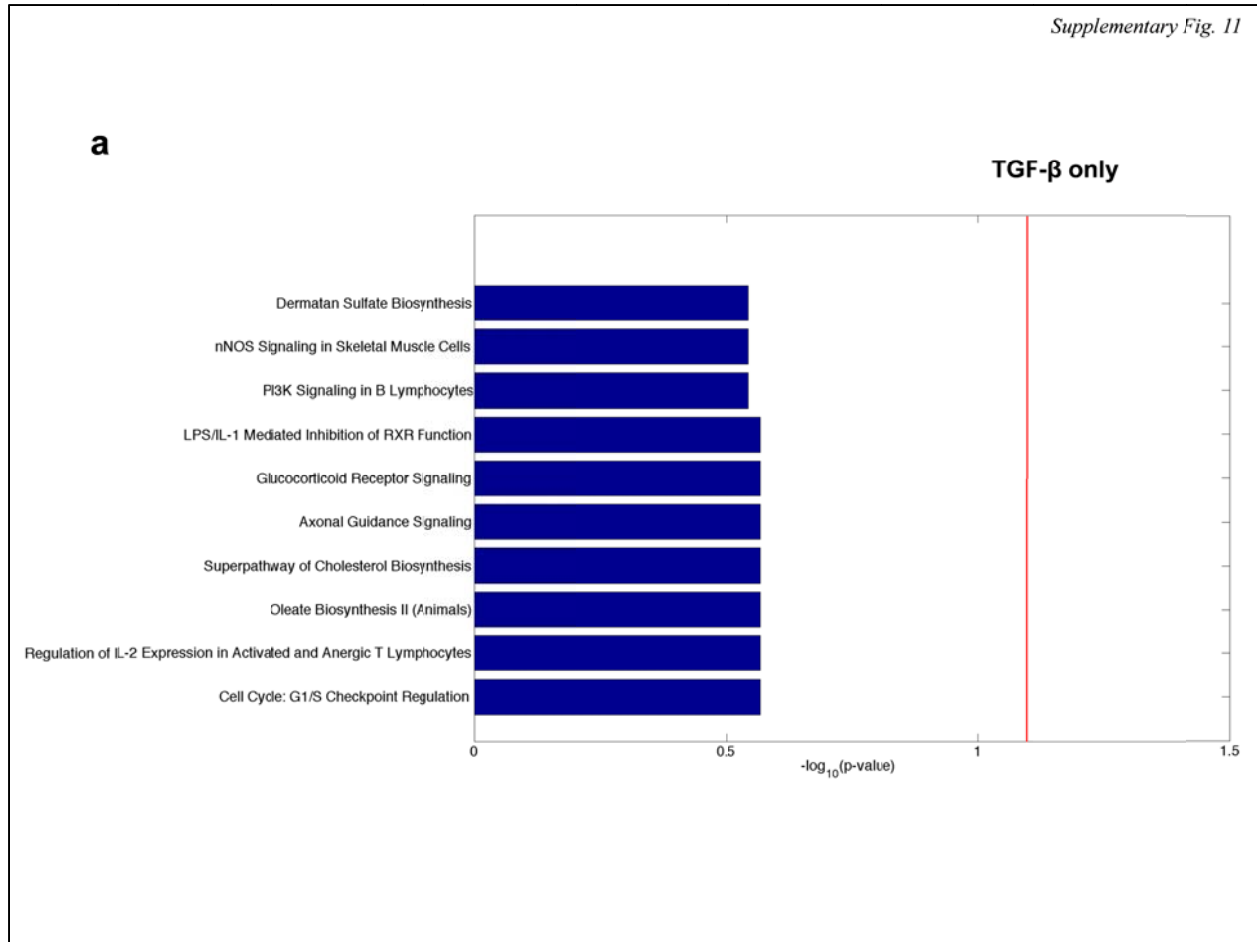

**Supplementary Fig. 11. Oxidative stress causes inflammatory and fibrotic pathway upregulation in HUVECs. (a)** Pathway analysis performed on upregulated genes identified from microarray data indicated that at the doses used for EndMT induction TGF- $\beta$  alone did not upregulate any specific pathways in HUVECs. Significant upregulation is indicated if the horizontal (blue) pathway bar crosses to the right of the vertical red line.

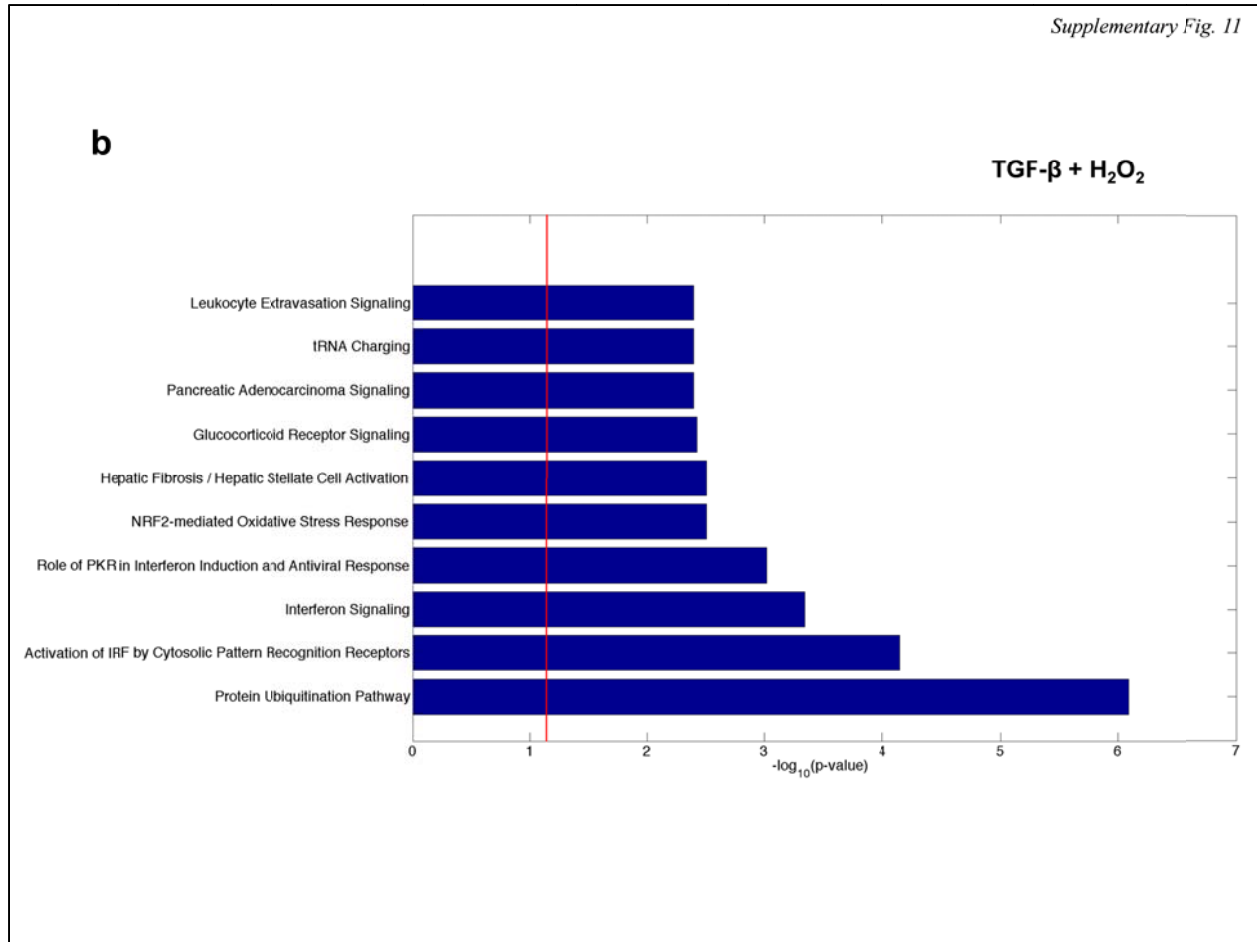

**Supplementary Fig. 11 (continued). (b)** In contrast, TGF- $\beta$ +H<sub>2</sub>O<sub>2</sub> caused a significant upregulation of a number of pathways, with many of these being related to oxidative stress, inflammation and fibrosis. The 10 most significantly upregulated pathways are presented. Significant upregulation is indicated if the horizontal (blue) pathway bar crosses to the right of the vertical red line.

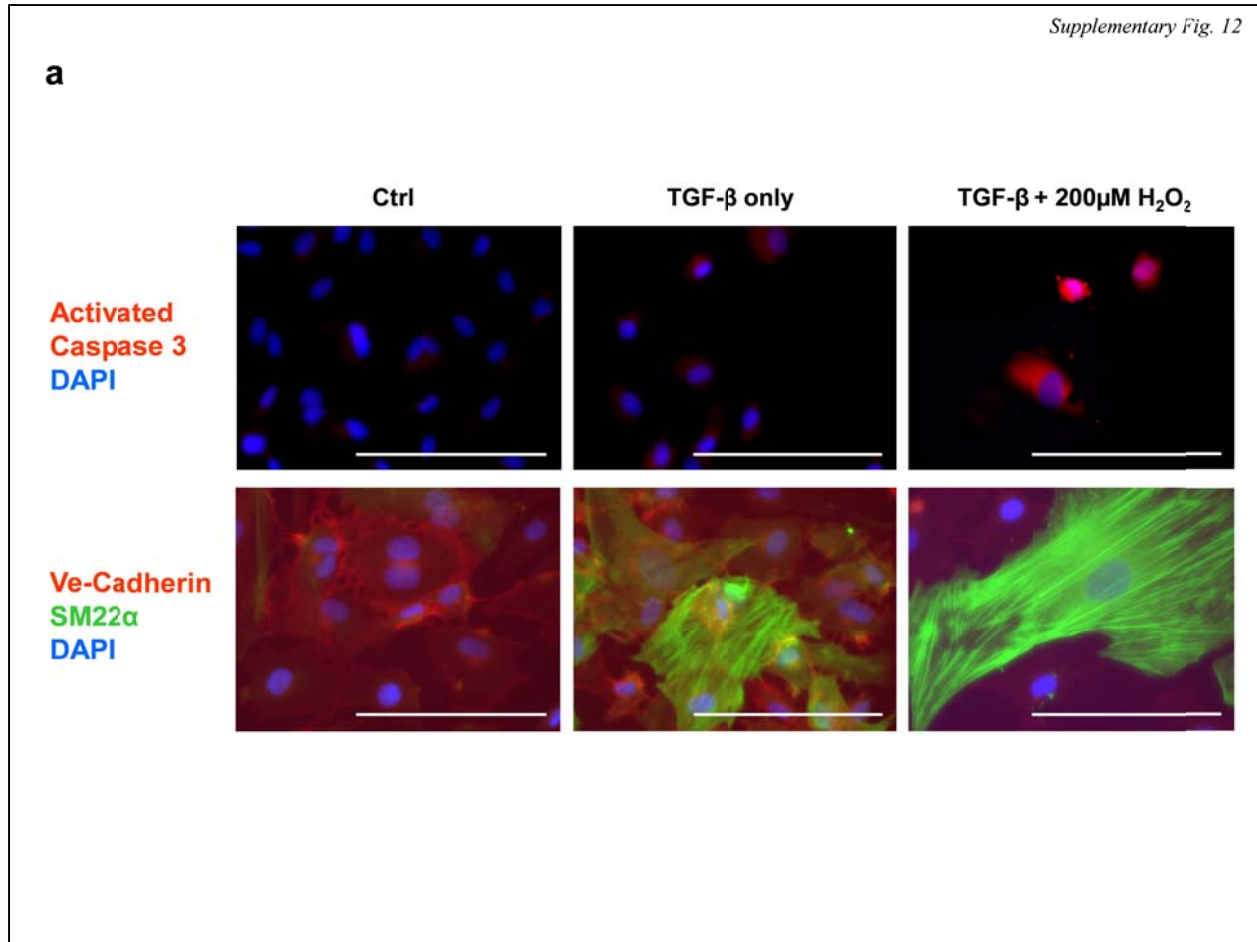

**Supplementary Fig. 12. Oxidative stress increases EndMT and is additive to the effect of TGF- $\beta$  in HCAECs. (a)** Immunostaining of HCAECs treated with endothelial growth media alone (Ctrl), TGF- $\beta$ , or TGF- $\beta$  plus 200 $\mu$ M H<sub>2</sub>O<sub>2</sub>, indicating induction of cellular stress with positive staining for active Caspase 3, and a progressive increase in EndMT with loss of Ve-Cadherin staining and gain of mesenchymal protein expression (in this case, SM22 $\alpha$ ) with TGF- $\beta$ , and particularly TGF- $\beta$  plus 200 $\mu$ M H<sub>2</sub>O<sub>2</sub>. Scale bars represent 100  $\mu$ m.

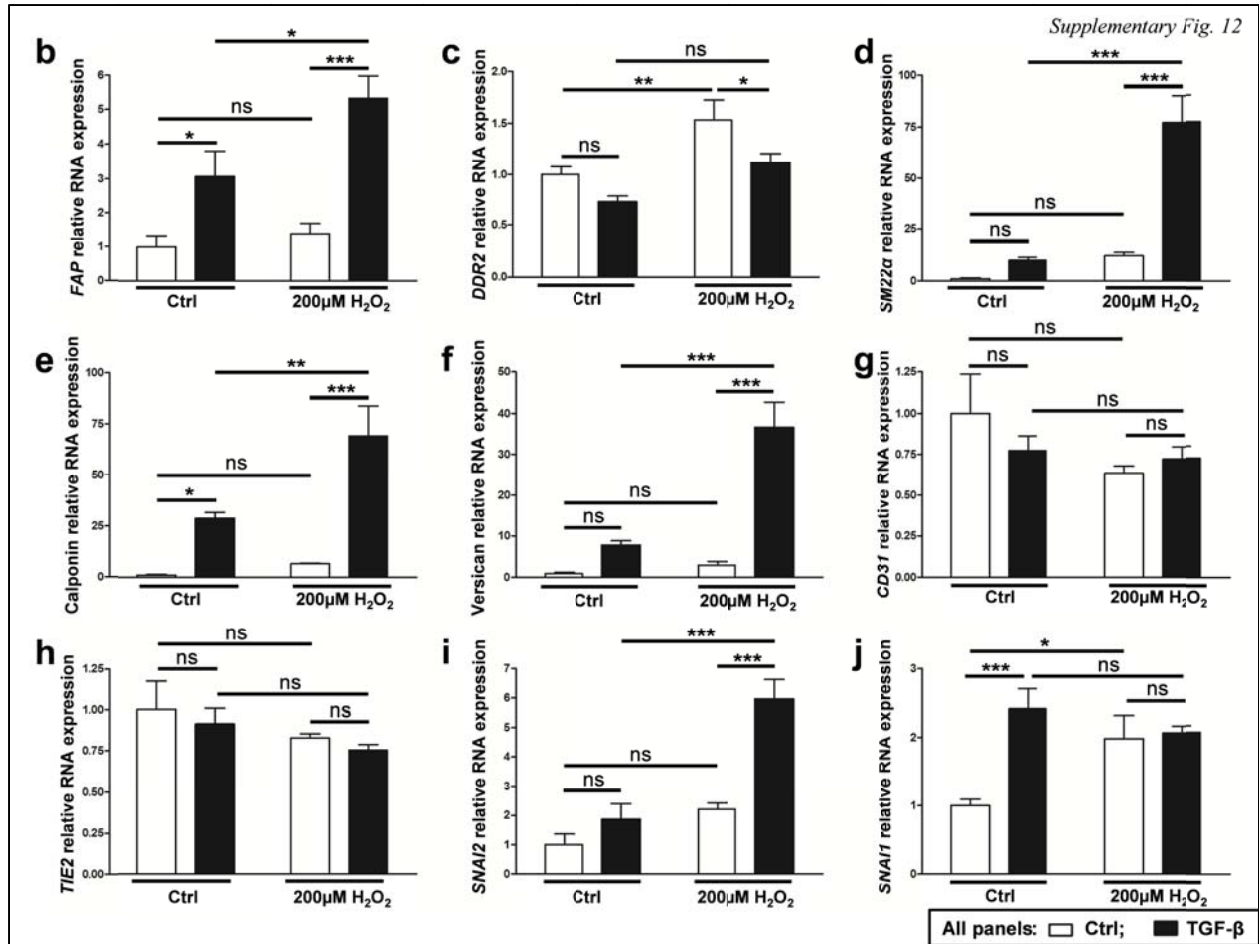

**Supplementary Fig. 12 (continued).** (b - f) Relative RNA expression of *FAP*, *DDR2*, *SM22α*, Calponin and Versican (respectively) in HCAECs assessed by qRT-PCR in response to treatment with TGF-β and H<sub>2</sub>O<sub>2</sub>. (g, h) Relative RNA expression of *CD31* and *TIE2* (respectively) assessed by qRT-PCR was non-significantly decreased by TGF-β and H<sub>2</sub>O<sub>2</sub>. (i) Relative RNA expression of *SNAI2* assessed by qRT-PCR was increased by both TGF-β and H<sub>2</sub>O<sub>2</sub> in an additive fashion. (j) Relative RNA expression of *SNAI1* assessed by qRT-PCR was increased by both TGF-β and H<sub>2</sub>O<sub>2</sub>, but unlike *SNAI2* this effect was not additive. All experiments in Supplementary Fig. 12 involved induction of EndMT by cell stimulation with TGF-β and/or H<sub>2</sub>O<sub>2</sub> over 5 days (see methods). Data in Supplementary Fig. 12 were analyzed by 2-way ANOVA with complete results presented in Supplementary Table 5. ns not significant, \**P* < 0.05, \*\**P* < 0.01, \*\*\**P* < 0.001, \*\*\*\**P* < 0.0001. *n* = 6 in all experiments.

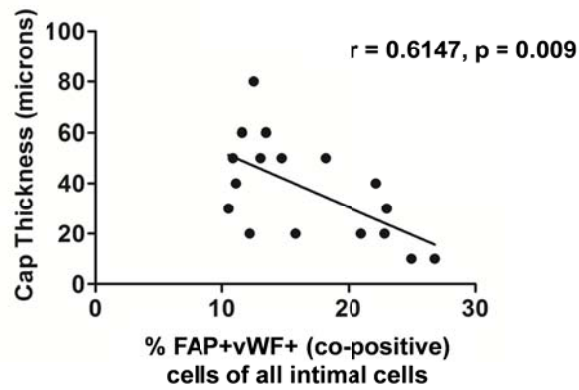

**Supplementary Fig. 13. EndMT is more common in plaques with thin fibrous cap.** Plaques identified in human samples obtained at autopsy from the abdominal aorta were classified as AHA type V or VI according to standard criteria (see methods). The % of co-positive cells per 20x field was expressed as a function of the total number of DAPI<sup>+</sup> cells (per field). Limited scatter plot and regression line for aortic plaque cap thickness versus % FAP<sup>+</sup>vWF<sup>+</sup> co-positive cells. Only plaques with cap thickness < 100  $\mu$ m are presented in this analysis.  $r = 0.6147$ ,  $p = 0.009$ . After exclusion of 7 plaques with cap thickness > 100  $\mu$ m from our original data, a total of 17 separate plaques from 10 patients are presented.



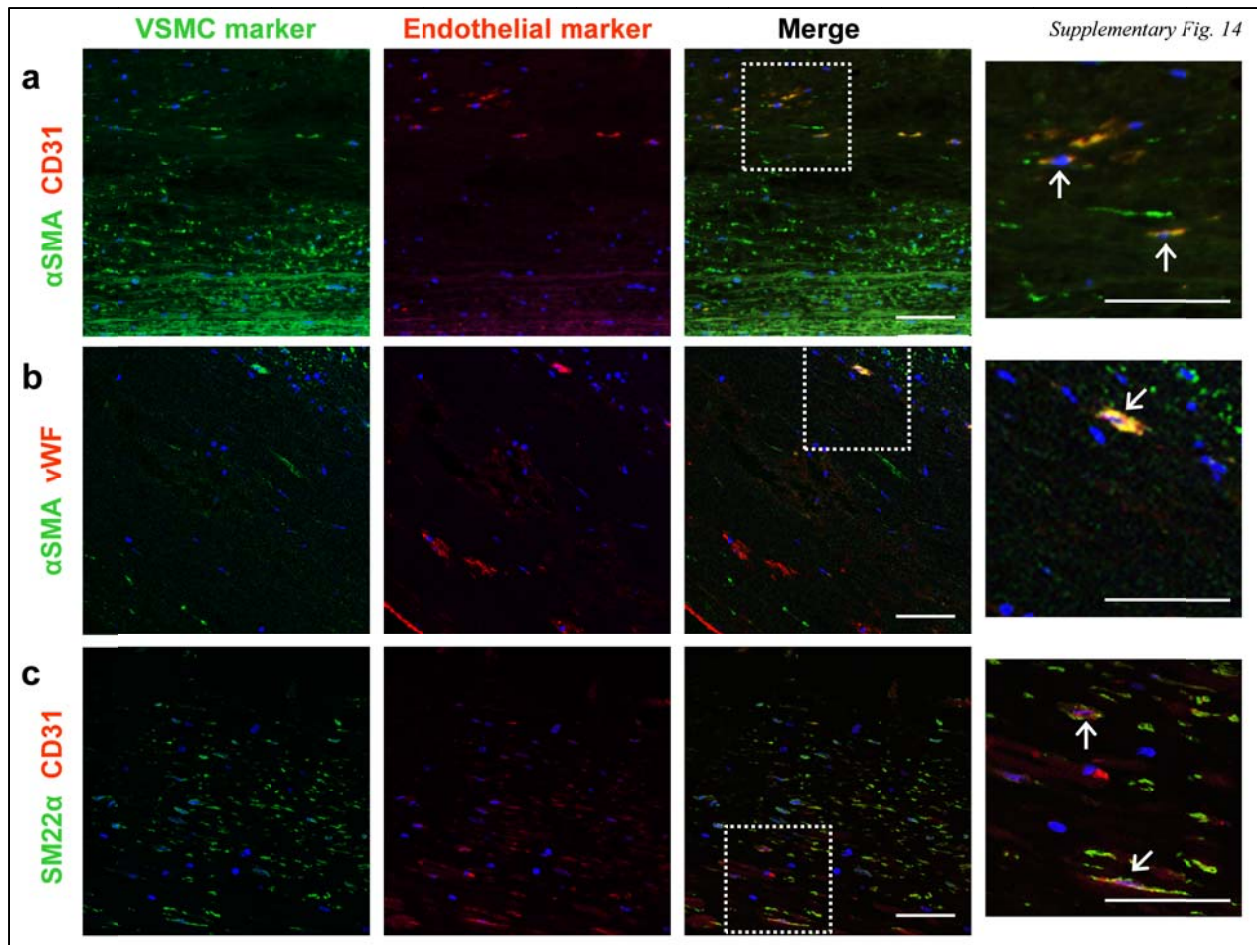

**Supplementary Fig. 14. EndMT gives rise to infrequent vascular smooth muscle cells in human atherosclerosis.** AHA type V plaques were identified from human aortic samples obtained at autopsy. Plaques were classified as AHA type V according to standard criteria (see methods). Staining was performed using various endothelial-VSMC marker combinations as follows: **(a)**  $\alpha$ SMA/CD31, **(b)**  $\alpha$ SMA/vWF, **(c)** SM22 $\alpha$ /CD31. All scale bars represent 50  $\mu$ m. Insets are shown at higher magnification as indicated and arrows indicate co-positive cells.

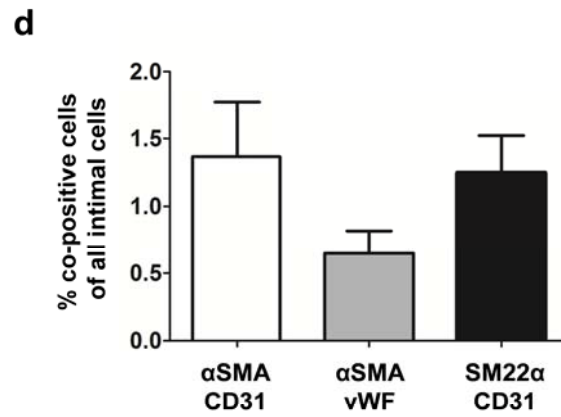

**Supplementary Fig. 14 (continued).** (d) The % of co-positive cells per 20x field was expressed as a function of the total number of DAPI<sup>+</sup> cells (per field). Two separate plaques from 5 ( $\alpha$ SMA/CD31 and SM22 $\alpha$ /CD31) or 6 ( $\alpha$ SMA/vWF) different patients were randomly included per analysis.

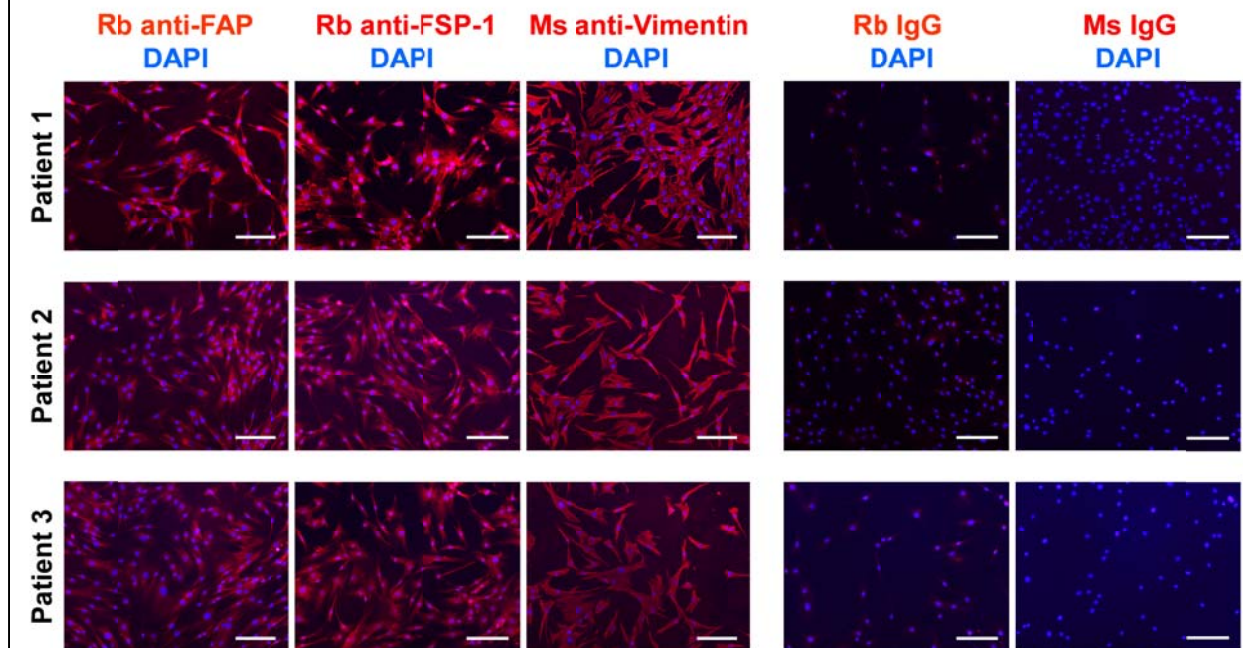

**Supplementary Fig. 15. Characterization of human fibroblast cell lines.** Immunostaining of fibroblast cell lines from 3 healthy control subjects for FAP, FSP-1 and Vimentin. These fibroblast lines are those used in the microarray and MMP expression experiments shown in Figs. 6a - f. Corresponding IgG control staining is shown. Rb rabbit; Ms mouse. Scale bars represent 100 μm.

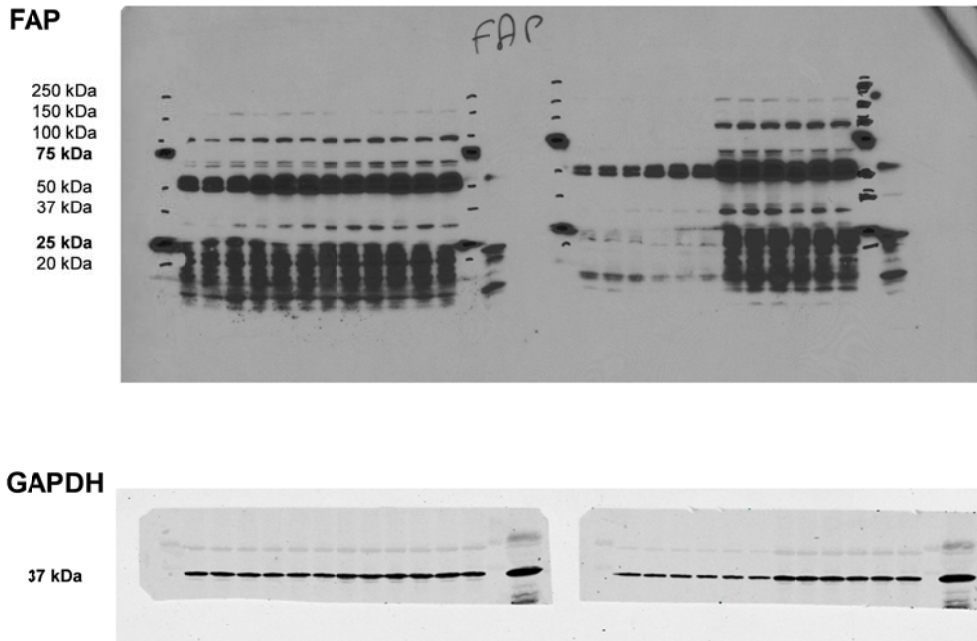

**Supplementary Fig. 16. Original immunoblots from Fig. 3e.** Ladder marker sizes shown on left. FAP expected molecular weight/size is 90kDa. GAPDH expected molecular weight/size is 37kDa. 2 membranes were imaged adjacent to one another. On the right membranes, the first 6 lanes were control lanes loaded with substantially lower levels of protein and not included in the main Figures.

**CD31**

250 kDa  
150 kDa  
100 kDa

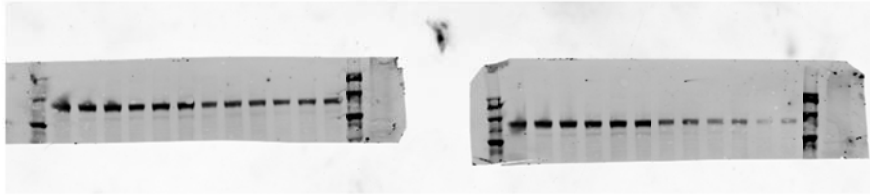

**GAPDH**

37 kDa

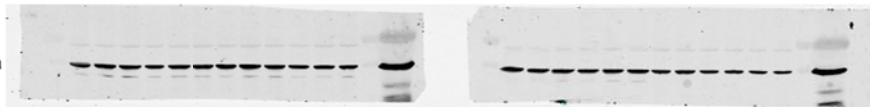

**Supplementary Fig. 17. Original immunoblots from Fig. 3g.** Ladder marker sizes shown on left. CD31 expected molecular weight/size is 130kDa. GAPDH expected molecular weight/size is 37kDa. 2 membranes were imaged adjacent to one another. On the right membranes, the first 6 lanes were additional control lanes and not included in the main Figures.

**SM22 $\alpha$**

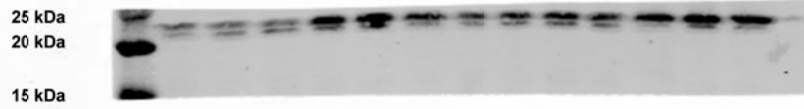

**GAPDH**

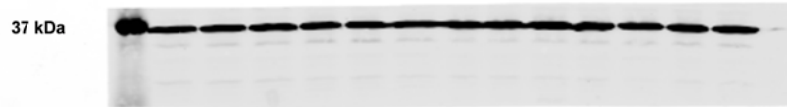

**Supplementary Fig. 18. Original immunoblots from Fig. 4m.** Ladder marker sizes shown on left. SM22 $\alpha$  expected molecular weight/size is 23kDa. GAPDH expected molecular weight/size is 37kDa. Note that a final additional lane is present (most rightward lane), which represented an additional sample (4<sup>th</sup>) sample under conditions of combined hypoxia and TGF- $\beta$  treatment.



**CD31**

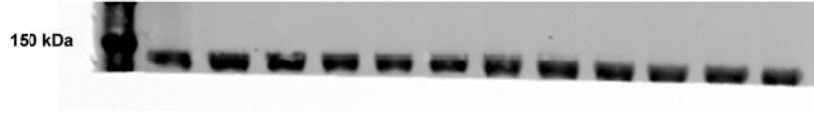

**GAPDH**

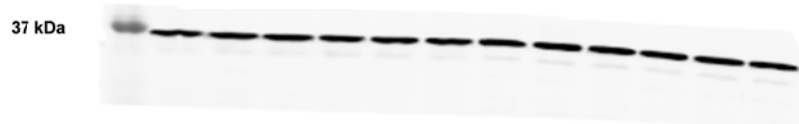

**Supplementary Fig. 19. Original immunoblots from Fig. 4n.** Ladder marker sizes shown on left. CD31 expected molecular weight/size is 130kDa. GAPDH expected molecular weight/size is 37kDa.

**Activated  
Caspase 3**

25 kDa  
20 kDa  
15 kDa

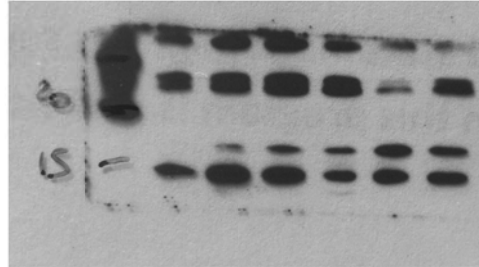

**GAPDH**

37 kDa

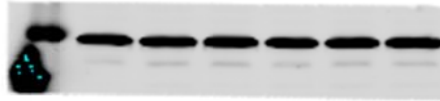

**Supplementary Fig. 20. Original immunoblots from Supplementary Fig. 9c.** Ladder marker sizes shown on left. Activated Caspase 3 expected molecular weight/size is 17kDa. GAPDH expected molecular weight/size is 37kDa.

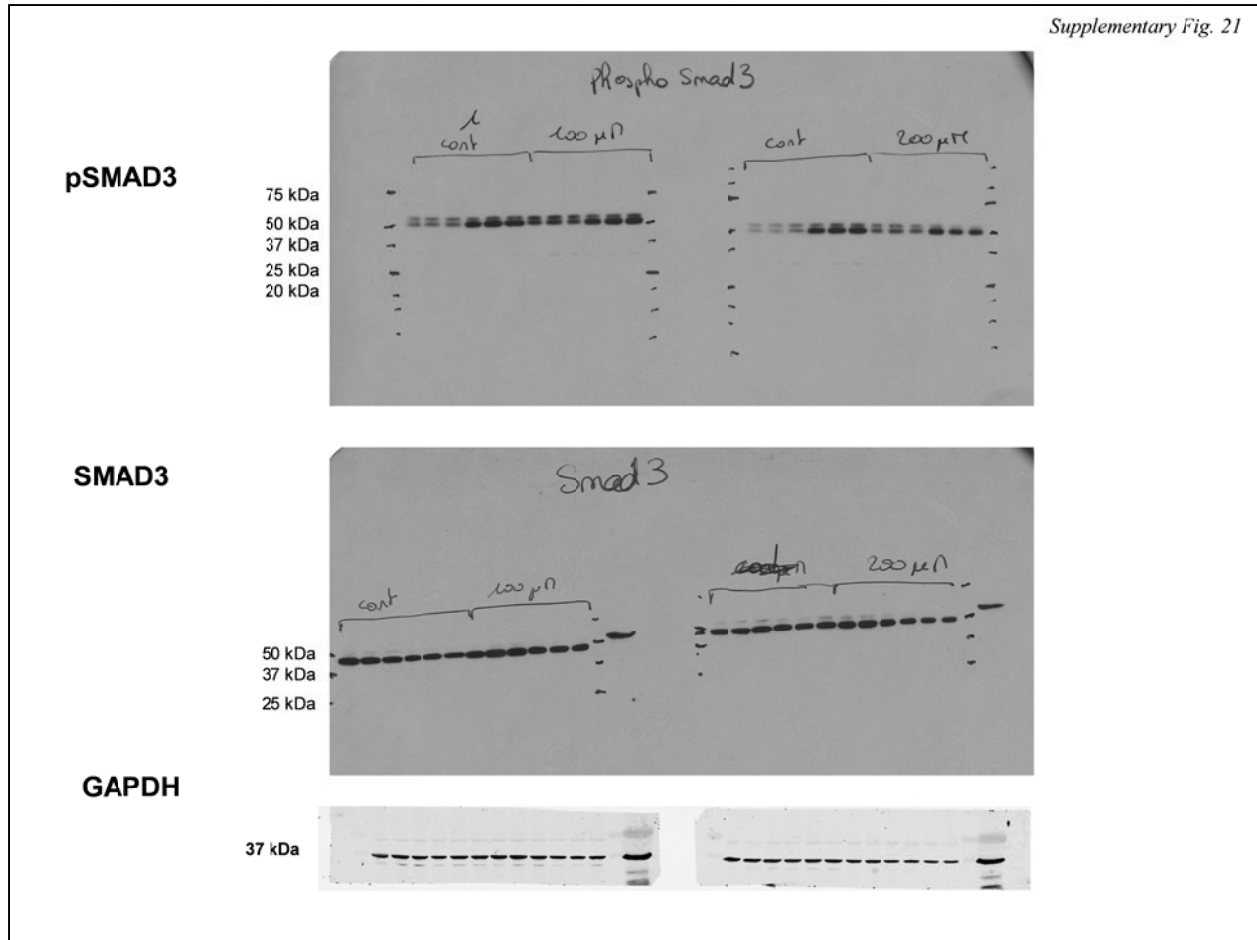

**Supplementary Fig. 21. Original immunoblots from Supplementary Fig. 10g.** Ladder marker sizes shown on left. pSMAD3 expected molecular weight/size is 48kDa. SMAD3 expected molecular weight/size is 52kDa. GAPDH expected molecular weight/size is 37kDa. On the right membranes, the first 6 lanes were additional control lanes and not included in the main Figures.

**Supplementary Table 1.** Complete results of 2-way ANOVA analyses for Supplementary Fig. 9, representing comparisons of HUVECs exposed to TGF- $\beta$  and/or H<sub>2</sub>O<sub>2</sub>.

| Figure   | Event studied      | Source of variation (% of total variation, p value) |                               |                    | Bonferroni posttest p value      |                                           |                                           |                                                                                |              |                                                                                |              |
|----------|--------------------|-----------------------------------------------------|-------------------------------|--------------------|----------------------------------|-------------------------------------------|-------------------------------------------|--------------------------------------------------------------------------------|--------------|--------------------------------------------------------------------------------|--------------|
|          |                    | Inter-action                                        | H <sub>2</sub> O <sub>2</sub> | TGF- $\beta$       | No TGF- $\beta$ vs. TGF- $\beta$ |                                           |                                           | No H <sub>2</sub> O <sub>2</sub> vs. 100 $\mu$ M H <sub>2</sub> O <sub>2</sub> |              | No H <sub>2</sub> O <sub>2</sub> vs. 200 $\mu$ M H <sub>2</sub> O <sub>2</sub> |              |
|          |                    |                                                     |                               |                    | No H <sub>2</sub> O <sub>2</sub> | 100 $\mu$ M H <sub>2</sub> O <sub>2</sub> | 200 $\mu$ M H <sub>2</sub> O <sub>2</sub> | No TGF- $\beta$                                                                | TGF- $\beta$ | No TGF- $\beta$                                                                | TGF- $\beta$ |
| Suppl 9a | Number of cells    | 0.07%;<br>P = 0.96                                  | 89.49%;<br>P < 0.0001         | 1.15%;<br>P = 0.25 | ns                               | ns                                        | ns                                        | < 0.01                                                                         | < 0.05       | < 0.001                                                                        | < 0.001      |
| Suppl 9b | BrdU incorporation | 1.50%;<br>P = 0.29                                  | 91.55%;<br>P < 0.0001         | 0.37%;<br>P = 0.43 | ns                               | ns                                        | ns                                        | < 0.0001                                                                       | < 0.001      | < 0.0001                                                                       | < 0.0001     |
| Suppl 9e | % dead cells       | 0.26%;<br>P = 0.94                                  | 57.35%;<br>P = 0.0004         | 1.49%;<br>P = 0.43 | ns                               | ns                                        | ns                                        | ns                                                                             | ns           | < 0.01                                                                         | < 0.01       |

**Supplementary Table 2.** List of genes and transcription factors presented in Fig. 3d that are altered in EndMT/EMT and supporting references.

| <b>Abbreviated name</b>           | <b>Full name</b>                                                | <b>Alternative name</b>                       | <b>Reference</b> |
|-----------------------------------|-----------------------------------------------------------------|-----------------------------------------------|------------------|
| <b>Endothelial</b>                |                                                                 |                                               |                  |
| <i>VWF</i>                        | von Willebrand factor                                           |                                               | 1                |
| <i>CAV1</i>                       | Caveolin-1                                                      |                                               | 2                |
| <i>ICAM2</i>                      | Intercellular adhesion molecule 2                               |                                               | 3                |
| <i>PECAM1</i>                     | Platelet/endothelial cell adhesion molecule 1                   | CD31                                          | 1                |
| <i>CDH5</i>                       | Cadherin-5                                                      | VE-Cadherin;<br>CD144                         | 1                |
| <i>SOX18</i>                      | SRY-related HMG-box 18                                          |                                               | 4                |
| <i>ENG</i>                        | Endoglin                                                        | CD105                                         | 5                |
| <i>ESAM</i>                       | Endothelial cell adhesion molecule                              |                                               | 6                |
| <i>TEK</i>                        |                                                                 | TIE2; CD202B                                  | 1                |
| <i>GPR116</i>                     | G Protein-Coupled Receptor 1161                                 |                                               | 7                |
| <i>CD34</i>                       | CD34                                                            |                                               | 1                |
| <i>FLI1</i>                       | Friend leukemia virus integration 1                             |                                               | 8                |
| <i>EMCN</i>                       | Endomucin                                                       |                                               | 9                |
| <i>TIE1</i>                       | Tyrosine kinase with immunoglobulin-like and EGF-like domains 1 |                                               | 10               |
| <i>LMO2</i>                       | LIM domain only 2                                               |                                               | 11               |
| <i>EGFL7</i>                      | EGF-like domain-containing protein 7                            | Vascular Endothelial-statin                   | 12               |
| <i>SOX7</i>                       | SRY (sex determining region Y)-box 7                            |                                               | 13               |
| <i>NOS3</i>                       | Nitric oxide synthase 3                                         | eNOS                                          | 1                |
| <i>KDR</i>                        | Kinase insert domain receptor                                   | vascular endothelial growth factor receptor 2 | 14               |
| <i>LYVE1</i>                      | Lymphatic vessel endothelial hyaluronan receptor 1              | XLKD                                          | 15               |
| <i>ETV2</i>                       | Ets Variant 2                                                   |                                               | 13               |
| <i>SELP</i>                       | P-selectin                                                      | CD62                                          | 16               |
| <i>CLDN3</i>                      | Claudin-3                                                       | Tight junction protein                        | 17               |
| <i>VCAM1</i>                      | Vascular cell adhesion protein 1                                | CD106                                         | 18               |
| <i>SELE</i>                       | E-selectin                                                      | CD62E                                         | 19               |
|                                   |                                                                 |                                               |                  |
| <b>Downregulated in EndMT/EMT</b> |                                                                 |                                               |                  |
| <i>CAV2</i>                       | Caveolin-2                                                      |                                               | 20               |
| <i>KRT19</i>                      | Keratin, type I cytoskeletal 1                                  | cytokeratin-19                                | 21               |

|                                 |                                                                                               |                                   |        |
|---------------------------------|-----------------------------------------------------------------------------------------------|-----------------------------------|--------|
| <i>TP53</i>                     | Tumor protein p53                                                                             | p53                               | 22     |
| <i>MTUS1</i>                    | Mitochondrial tumor suppressor 1                                                              |                                   | 23     |
| <i>CXADR</i>                    | Coxsackievirus and adenovirus receptor                                                        | CAR                               | 24     |
| <i>JUP</i>                      | Junction Plakoglobin                                                                          | Desmoplakin-3;<br>gamma-catenin   | 25     |
| <i>DSP</i>                      | Desmoplakin                                                                                   |                                   | 26     |
|                                 |                                                                                               |                                   |        |
| <b>Upregulated in EndMT/EMT</b> |                                                                                               |                                   |        |
| <i>ITGA5</i>                    | Integrin, alpha 5                                                                             | CD49e                             | 27     |
| <i>CALD1</i>                    | Caldesmon                                                                                     |                                   | 28     |
| <i>MSN</i>                      | Moesin                                                                                        |                                   | 29     |
| <i>SPOCK1</i>                   | Sparc/osteonectin, cwcv and kazal-like domains proteoglycan 1                                 | Testican                          | 30     |
| <i>SPARC</i>                    | Secreted protein acidic and rich in cysteine                                                  | Osteonectin                       | 31     |
| <i>ITGAV</i>                    | Integrin alpha-V                                                                              | CD51                              | 32     |
| <i>AHNAK</i>                    | AHNAK                                                                                         | Desmoyokin                        | 33     |
| <i>NOTCH1</i>                   |                                                                                               |                                   | 34     |
| <i>JAG1</i>                     | Jagged 1                                                                                      | CD339                             | 35     |
| <i>SLC22A4</i>                  | Solute carrier family 22, member 4                                                            |                                   | 36     |
| <i>ZEB2</i>                     | Zinc finger E-box-binding homeobox 2                                                          | Sip1                              | 37     |
| <i>CXCR4</i>                    | C-X-C chemokine receptor type 4                                                               | CD184                             | 38     |
| <i>ZEB1</i>                     | Zinc finger E-box-binding homeobox 1                                                          |                                   | 39     |
| <i>HEY2</i>                     | Hairy/enhancer-of-split related with YRPW motif protein 2                                     | CHF1                              | 39, 40 |
| <i>SNAI1</i>                    |                                                                                               | SNAIL                             | 41     |
| <i>SNAI2</i>                    |                                                                                               | SLUG                              | 41     |
| <i>HEY1</i>                     | Hairy/enhancer-of-split related with YRPW motif protein 1                                     |                                   | 42     |
| <i>TWIST1</i>                   | Twist-related protein 1                                                                       | TWIST                             | 41     |
| <i>WNT5B</i>                    | Wingless-type MMTV integration site family, member 5B                                         |                                   | 43     |
| <i>WNT11</i>                    | Wingless-type MMTV integration site family, member 11                                         |                                   | 44     |
| <i>HEYL</i>                     | Hairy/enhancer-of-split related with YRPW motif-like protein                                  |                                   | 45     |
| <i>VPS13A</i>                   | Vacuolar protein sorting-associated protein 13A                                               |                                   | 46, 47 |
|                                 |                                                                                               |                                   |        |
| <b>Mesenchymal</b>              |                                                                                               |                                   |        |
| <i>VIM</i>                      | Vimentin                                                                                      |                                   | 48     |
| <i>SERPINE1</i>                 | Serpin peptidase inhibitor, clade E (nexin, plasminogen activator inhibitor type 1), member 1 | Plasminogen activator inhibitor-1 | 49     |



|                  |                                                                                               |                                           |          |
|------------------|-----------------------------------------------------------------------------------------------|-------------------------------------------|----------|
| <i>CTGF</i>      | Connective tissue growth factor                                                               | CCN2                                      | 50<br>36 |
| <i>SRGN</i>      | Serglycin                                                                                     | PPG; PRG1                                 | 36       |
| <i>TUBA1A</i>    | Tubulin alpha-1A chain                                                                        |                                           | 36       |
| <i>MYH9</i>      | Myosin, heavy chain 9                                                                         | NMHC-IIA                                  | 51       |
| <i>TPM1</i>      | Tropomyosin alpha-1 chain                                                                     |                                           | 52       |
| <i>TAGLN</i>     | Transgelin                                                                                    | SM22; SM22 $\alpha$                       | 41       |
| <i>CDH2</i>      | Cadherin-2                                                                                    | neural cadherin (NCAD)                    | 53       |
| <i>COL5A1</i>    | Collagen, type V, alpha 1                                                                     |                                           | 54       |
| <i>NT5E</i>      | 5'-nucleotidase                                                                               | CD73                                      | 55       |
| <i>COL5A2</i>    | Collagen, type V, alpha 2                                                                     |                                           | 56       |
| <i>SRF</i>       | Serum response factor                                                                         |                                           | 57       |
| <i>ACTA2</i>     | Alpha-actin-2                                                                                 | alpha smooth muscle actin ( $\alpha$ SMA) | 41       |
| <i>PLAT</i>      | Tissue plasminogen activator                                                                  | tPA                                       | 58       |
| <i>PLAU</i>      | Urokinase-type plasminogen activator                                                          |                                           | 49       |
| <i>CDH11</i>     | Cadherin-11                                                                                   | CAD11                                     | 56       |
| <i>P4HA1</i>     | Prolyl 4-hydroxylase subunit alpha-1                                                          | P4HA                                      | 59       |
| <i>SERPINE 2</i> | Serpin peptidase inhibitor, clade E (nexin, plasminogen activator inhibitor type 1), member 2 |                                           | 60       |
| <i>PTX3</i>      | Pentraxin-related protein PTX3                                                                |                                           | 56       |
| <i>RECK</i>      | Reversion-inducing-cysteine-rich protein with kazal motifs                                    |                                           | 36       |
| <i>FBLN5</i>     | Fibulin-5                                                                                     |                                           | 56<br>36 |
| <i>MMP2</i>      | Matrix metalloproteinase-2                                                                    |                                           | 61       |
| <i>PLAUR</i>     | Urokinase receptor                                                                            | CD87                                      | 60       |
| <i>PRKCA</i>     | Protein kinase C alpha                                                                        | PKC $\alpha$                              | 36       |
| <i>NEXN</i>      | Nexilin                                                                                       | F-actin binding protein                   | 41       |
| <i>MMP14</i>     | Matrix metalloproteinase-14                                                                   |                                           | 60       |
| <i>POSTN</i>     | Periostin                                                                                     | Osteoblast specific factor                | 56       |
| <i>DLC1</i>      | Deleted in Liver Cancer 1                                                                     | STARD12                                   | 56<br>36 |
| <i>COL1A2</i>    | Collagen, type I, alpha 2                                                                     |                                           | 56       |
| <i>FN1</i>       | Fibronectin                                                                                   |                                           | 52       |
| <i>PLEK2</i>     | Pleckstrin-2                                                                                  |                                           | 60       |
| <i>COL6A1</i>    | Collagen, type VI, alpha 1                                                                    |                                           | 62       |
| <i>IGFBP3</i>    | Insulin-like growth factor-binding protein 3                                                  |                                           | 36       |
| <i>VCAN</i>      | Versican                                                                                      |                                           | 63       |
| <i>COL3A1</i>    | Collagen, type III, alpha 1                                                                   |                                           | 56       |

|               |                                                                |                                             |          |
|---------------|----------------------------------------------------------------|---------------------------------------------|----------|
| <i>NOTCH3</i> | Neurogenic locus notch homolog protein 3                       | CADASIL                                     | 64       |
| <i>CD248</i>  |                                                                | Endosialin; TEM1                            | 65<br>66 |
| <i>FAP</i>    | Fibroblast activation protein                                  | DPPIV                                       | 56       |
| <i>S100A4</i> | S100 calcium-binding protein A4                                |                                             | 67       |
| <i>CNN1</i>   | CCN family member 1                                            | Cysteine-rich angiogenic inducer 61 (CYR61) | 68       |
| <i>COL1A1</i> | Collagen, type I, alpha 1                                      |                                             | 69<br>36 |
| <i>ADAM12</i> | Disintegrin and metalloproteinase domain-containing protein 12 |                                             | 70<br>36 |
| <i>NID2</i>   | Nidogen-2                                                      |                                             | 36       |
| <i>SPP1</i>   | Secreted phosphoprotein 1                                      | Osteopontin; OPN                            | 71       |
| <i>CD44</i>   |                                                                |                                             | 72       |
| <i>FBLN1</i>  | Fibulin-1                                                      |                                             | 56<br>36 |
| <i>DDR2</i>   | Discoidin domain-containing receptor 2                         |                                             | 56       |
| <i>MMP9</i>   | Matrix metalloproteinase-9                                     |                                             | 61       |

**Supplementary Table 3.** Complete results of 2-way ANOVA analyses for Fig. 3e - h, representing comparisons of HUVECs exposed to TGF- $\beta$  and/or H<sub>2</sub>O<sub>2</sub>.

| Figure    | Event studied       | Source of variation (% of total variation, p value) |                               |                       | Bonferroni posttest p value      |                                           |                                           |                                                                                |              |                                                                                |              |  |
|-----------|---------------------|-----------------------------------------------------|-------------------------------|-----------------------|----------------------------------|-------------------------------------------|-------------------------------------------|--------------------------------------------------------------------------------|--------------|--------------------------------------------------------------------------------|--------------|--|
|           |                     | Inter-action                                        | H <sub>2</sub> O <sub>2</sub> | TGF- $\beta$          | No TGF- $\beta$ vs. TGF- $\beta$ |                                           |                                           | No H <sub>2</sub> O <sub>2</sub> vs. 100 $\mu$ M H <sub>2</sub> O <sub>2</sub> |              | No H <sub>2</sub> O <sub>2</sub> vs. 200 $\mu$ M H <sub>2</sub> O <sub>2</sub> |              |  |
|           |                     |                                                     |                               |                       | No H <sub>2</sub> O <sub>2</sub> | 100 $\mu$ M H <sub>2</sub> O <sub>2</sub> | 200 $\mu$ M H <sub>2</sub> O <sub>2</sub> | No TGF- $\beta$                                                                | TGF- $\beta$ | No TGF- $\beta$                                                                | TGF- $\beta$ |  |
| Figure 3e | FAP protein levels  | 3.4%;<br>P = 0.059                                  | 83.50%;<br>P < 0.0001         | 7.46%;<br>P = 0.0018  | < 0.05                           | ns                                        | < 0.05                                    | < 0.05                                                                         | ns           | < 0.001                                                                        | < 0.001      |  |
| Figure 3f | FAP RNA levels      | 11.65%;<br>P = 0.0012                               | 27.16%;<br>P < 0.0001         | 33.49%;<br>P < 0.0001 | ns                               | < 0.05                                    | < 0.001                                   | ns                                                                             | ns           | ns                                                                             | < 0.001      |  |
| Figure 3g | CD31 protein levels | 8.34%;<br>P = 0.017                                 | 73.53%;<br>P < 0.0001         | 3.99%;<br>P = 0.039   | ns                               | ns                                        | < 0.01                                    | < 0.001                                                                        | < 0.01       | < 0.001                                                                        | < 0.001      |  |
| Figure 3h | CD31 RNA levels     | 9.58%;<br>P = 0.057                                 | 35.03%;<br>P = 0.001          | 0.32%;<br>P = 0.65    | ns                               | ns                                        | ns                                        | < 0.001                                                                        | ns           | < 0.001                                                                        | < 0.05       |  |

**Supplementary Table 4.** Complete results of 2-way ANOVA analyses for Supplementary Fig. 10, representing comparisons of HUVECs exposed to TGF- $\beta$  and/or H<sub>2</sub>O<sub>2</sub>.

| Figure    | Event studied           | Source of variation (% of total variation, p value) |                               |                       | Bonferroni posttest p value      |                                           |                                           |                                                                                |              |                                                                                |              |  |
|-----------|-------------------------|-----------------------------------------------------|-------------------------------|-----------------------|----------------------------------|-------------------------------------------|-------------------------------------------|--------------------------------------------------------------------------------|--------------|--------------------------------------------------------------------------------|--------------|--|
|           |                         | Inter-action                                        | H <sub>2</sub> O <sub>2</sub> | TGF- $\beta$          | No TGF- $\beta$ vs. TGF- $\beta$ |                                           |                                           | No H <sub>2</sub> O <sub>2</sub> vs. 100 $\mu$ M H <sub>2</sub> O <sub>2</sub> |              | No H <sub>2</sub> O <sub>2</sub> vs. 200 $\mu$ M H <sub>2</sub> O <sub>2</sub> |              |  |
|           |                         |                                                     |                               |                       | No H <sub>2</sub> O <sub>2</sub> | 100 $\mu$ M H <sub>2</sub> O <sub>2</sub> | 200 $\mu$ M H <sub>2</sub> O <sub>2</sub> | No TGF- $\beta$                                                                | TGF- $\beta$ | No TGF- $\beta$                                                                | TGF- $\beta$ |  |
| Suppl 10a | Calponin RNA levels     | 13.85%;<br>P = 0.0020                               | 21.37%;<br>P = 0.0001         | 33.55%;<br>P < 0.0001 | ns                               | ns                                        | < 0.001                                   | ns                                                                             | ns           | ns                                                                             | < 0.001      |  |
| Suppl 10b | Versican RNA levels     | 7.95%;<br>P = 0.017                                 | 12.47%;<br>P = 0.0023         | 52.88%;<br>P < 0.0001 | < 0.05                           | < 0.01                                    | < 0.001                                   | ns                                                                             | ns           | ns                                                                             | < 0.001      |  |
| Suppl 10c | <i>SNAI2</i> RNA levels | 11.86%;<br>P = 0.0016                               | 36.84%;<br>P < 0.0001         | 26.77%;<br>P < 0.0001 | ns                               | ns                                        | < 0.001                                   | ns                                                                             | ns           | ns                                                                             | < 0.001      |  |
| Suppl 10d | <i>SNAI1</i> RNA levels | 1.64%;<br>P = 0.34                                  | 4.25%;<br>P = 0.071           | 68.17%;<br>P < 0.0001 | < 0.001                          | < 0.001                                   | < 0.001                                   | ns                                                                             | < 0.05       | ns                                                                             | ns           |  |
| Suppl 10e | <i>SMAD2</i> RNA levels | 0.19%;<br>P = 0.97                                  | 0.16%;<br>P = 0.82            | 8.02%;<br>P = 0.28    | ns                               | ns                                        | ns                                        | ns                                                                             | ns           | ns                                                                             | ns           |  |
| Suppl 10f | <i>SMAD3</i> RNA levels | 2.51%;<br>P = 0.31                                  | 47.85%;<br>P < 0.0001         | 19.19%;<br>P = 0.0001 | ns                               | ns                                        | < 0.01                                    | < 0.05                                                                         | < 0.01       | < 0.001                                                                        | < 0.001      |  |
| Suppl 10g | SMAD3 protein levels    | 13.45%;<br>P = 0.091                                | 26.35%;<br>P = 0.015          | 19.27%;<br>P = 0.012  | ns                               | ns                                        | < 0.05                                    | ns                                                                             | ns           | < 0.01                                                                         | ns           |  |
| Suppl 10g | pSMAD3 protein levels   | 5.33%;<br>P = 0.0076                                | 0.88%;<br>P = 0.36            | 65.74%;<br>P < 0.0001 | < 0.001                          | < 0.001                                   | < 0.001                                   | < 0.01                                                                         | ns           | ns                                                                             | ns           |  |

**Supplementary Table 5.** Complete results of 2-way ANOVA analyses for Supplementary Fig. 12, representing comparisons of HCAECs exposed to TGF- $\beta$  and/or H<sub>2</sub>O<sub>2</sub>.

| Figure    | Event studied                             | Source of variation (% of total variation, p value) |                               |                       | Bonferroni posttest p value      |                                           |                                                                                |              |
|-----------|-------------------------------------------|-----------------------------------------------------|-------------------------------|-----------------------|----------------------------------|-------------------------------------------|--------------------------------------------------------------------------------|--------------|
|           |                                           | Inter-action                                        | H <sub>2</sub> O <sub>2</sub> | TGF- $\beta$          | No TGF- $\beta$ vs. TGF- $\beta$ |                                           | No H <sub>2</sub> O <sub>2</sub> vs. 200 $\mu$ M H <sub>2</sub> O <sub>2</sub> |              |
|           |                                           |                                                     |                               |                       | No H <sub>2</sub> O <sub>2</sub> | 200 $\mu$ M H <sub>2</sub> O <sub>2</sub> | No TGF- $\beta$                                                                | TGF- $\beta$ |
| Suppl 12b | <i>FAP</i> RNA levels                     | 5.79%;<br>P = 0.080                                 | 10.73%;<br>P = 0.021          | 55.52%;<br>P < 0.0001 | < 0.05                           | < 0.001                                   | ns                                                                             | < 0.05       |
| Suppl 12c | <i>DDR2</i> RNA levels                    | 0.9%;<br>P = 0.54                                   | 34.44%;<br>P = 0.0009         | 19.45%;<br>P = 0.0082 | ns                               | < 0.05                                    | < 0.01                                                                         | ns           |
| Suppl 12d | <i>SM22<math>\alpha</math></i> RNA levels | 17.03%;<br>P = 0.0005                               | 33.44%;<br>P < 0.0001         | 29.87%;<br>P < 0.0001 | ns                               | < 0.001                                   | ns                                                                             | < 0.001      |
| Suppl 12e | Calponin RNA levels                       | 7.51%;<br>P = 0.031                                 | 13.38%;<br>P = 0.0057         | 51.12%;<br>P < 0.0001 | < 0.05                           | < 0.001                                   | ns                                                                             | < 0.01       |
| Suppl 12f | Versican RNA levels                       | 17.49%;<br>P = 0.0004                               | 23.35%;<br>P < 0.0001         | 40.08%;<br>P < 0.0001 | ns                               | < 0.001                                   | ns                                                                             | < 0.001      |
| Suppl 12g | <i>CD31</i> RNA levels                    | 5.75%;<br>P = 0.25                                  | 10.21%;<br>P = 0.13           | 1.13%;<br>P = 0.61    | ns                               | ns                                        | ns                                                                             | ns           |
| Suppl 12h | <i>TIE2</i> RNA levels                    | 0.02%;<br>P = 0.95                                  | 11.43%;<br>P = 0.12           | 2.64%;<br>P = 0.44    | ns                               | ns                                        | ns                                                                             | ns           |
| Suppl 12i | <i>SNAI2</i> RNA levels                   | 10.97%;<br>P = 0.0064                               | 37.20%;<br>P < 0.0001         | 28.17%;<br>P < 0.0001 | ns                               | < 0.001                                   | ns                                                                             | < 0.001      |
| Suppl 12j | <i>SNAI1</i> RNA levels                   | 20.10%;<br>P = 0.0099                               | 4.70%;<br>P = 0.18            | 25.63%;<br>P = 0.0043 | < 0.001                          | ns                                        | < 0.05                                                                         | ns           |

**Supplementary Table 6.** PCR primers.

| Gene                            | Primers                |                                                             | Length of PCR products (base pairs) |
|---------------------------------|------------------------|-------------------------------------------------------------|-------------------------------------|
|                                 | Forward                | Reverse                                                     |                                     |
| <b>Mouse Genotyping Primers</b> |                        |                                                             |                                     |
| <i>ApoE</i>                     | GCCTAGCCGAGGGAGAGCCG   | (WT) TGTGACTTGGGAGCTCTGCAGC<br>(Mutant) GCCGCCCCGACTGCATCT  | Mutant: 245<br>WT: 155              |
| <i>Cre</i>                      | ATTGCTGTCACTTGGTCGTGG  | GAAAATGCTTCTGTCCGTTTGC                                      | 200                                 |
| <i>YFP</i>                      | AAAGTCGCTCTGAGTTGTTAT  | (WT) GGAGCGGGAGAAATGGATATG<br>(Mutant) GCGAAGAGTTTGCCTCAACC | Mutant: 320<br>WT: 600              |
| <b>Human Primers</b>            |                        |                                                             |                                     |
| <i>18S rRNA</i>                 | TTTCGGAAGTGGGAGGATGA   | GCAAATGCTTTCGCTCTGGTC                                       | 110                                 |
| <i>FAP</i>                      | CAAGTGGCAAGTGGGAGGCCA  | TGGGGATGCCTGGGCCGTAG                                        | 246                                 |
| <i>DDR2</i>                     | GACTTGACACCCCTCCATTT   | GAGTGGTCGGTGACTGGAAT                                        | 251                                 |
| <i>SM22<math>\alpha</math></i>  | CCTGGCTAGGGAAACCCACCCT | TCTGGGGAAAGCTCCTTGAAGT                                      | 300                                 |
| Calponin                        | GGCCAGCATGGCGAAGACGAAA | TGTGCCAGCTTGGGGTCGT                                         | 205                                 |
| <i>CD31</i>                     | GCGAGTCATGGCCCCAAGGC   | GGTGGTGCTGACATCCGCGA                                        | 246                                 |
| <i>SNAI1</i>                    | GCACGGCCTAGCGAGTGGTT   | GGGCTGCTGGAAGGTAAACTCTGG                                    | 171                                 |
| <i>SNAI2</i>                    | AACTCACACGGGGGAGAAGCCT | CAGTGTGCTACACAGCAGCCAGA                                     | 192                                 |
| <i>SMAD2</i>                    | AGTGCCCCGACACACCGAGA   | TCTGCTGGAGAGCCTGTGTCC                                       | 207                                 |
| <i>SMAD3</i>                    | TCAAGAAGACGGGGCAGCTGGA | GCACCAACACAGGAGGTAGAAGTGG                                   | 297                                 |
| <i>TIE2</i>                     | GCAATGAAGCATGCCACCCTGG | GGTAGCGCCAGCCAGAAGC                                         | 241                                 |
| Versican                        | GGTGCACTTTGTGAGCAAGA   | TTCGTGAGACAGGATGCTTG                                        | 159                                 |
| Ve-Cadherin                     | AACTCCCTTCTTACCC       | AAAGGCTGCTGGAAAATG                                          | 368                                 |
| <i>eNOS</i>                     | GTGGCTGTCTGCATGGACCT   | CCACGATGGTGACTTTGGCT                                        | 121                                 |
| <i>KDR</i>                      | TGCCTACCTCACCTGTTTC    | GGCTCTTTCGCTTACTGTTC                                        | 114                                 |



## Supplementary References

1. Pereira, C.F., *et al.* Induction of a hemogenic program in mouse fibroblasts. *Cell Stem Cell* **13**, 205-218 (2013).
2. Bauer, P.M., *et al.* Endothelial-specific expression of caveolin-1 impairs microvascular permeability and angiogenesis. *Proc Natl Acad Sci U S A* **102**, 204-209 (2005).
3. Cowan, P.J., *et al.* The human ICAM-2 promoter is endothelial cell-specific in vitro and in vivo and contains critical Sp1 and GATA binding sites. *J Biol Chem* **273**, 11737-11744 (1998).
4. Hosking, B.M., *et al.* SOX18 directly interacts with MEF2C in endothelial cells. *Biochem Biophys Res Commun* **287**, 493-500 (2001).
5. Cheifetz, S., *et al.* Endoglin is a component of the transforming growth factor-beta receptor system in human endothelial cells. *J Biol Chem* **267**, 19027-19030 (1992).
6. Elcheva, I., *et al.* Direct induction of haematoendothelial programs in human pluripotent stem cells by transcriptional regulators. *Nature communications* **5**, 4372 (2014).
7. Mancuso, P., *et al.* A subpopulation of circulating endothelial cells express CD109 and is enriched in the blood of cancer patients. *PLoS One* **9**, e114713 (2014).
8. Asano, Y., *et al.* Endothelial Fli1 deficiency impairs vascular homeostasis: a role in scleroderma vasculopathy. *Am J Pathol* **176**, 1983-1998 (2010).
9. Liu, C., *et al.* Human endomucin is an endothelial marker. *Biochem Biophys Res Commun* **288**, 129-136 (2001).
10. Partanen, J., *et al.* A novel endothelial cell surface receptor tyrosine kinase with extracellular epidermal growth factor homology domains. *Mol Cell Biol* **12**, 1698-1707 (1992).
11. Gratzinger, D., *et al.* The transcription factor LMO2 is a robust marker of vascular endothelium and vascular neoplasms and selected other entities. *American journal of clinical pathology* **131**, 264-278 (2009).
12. Parker, L.H., *et al.* The endothelial-cell-derived secreted factor Egl7 regulates vascular tube formation. *Nature* **428**, 754-758 (2004).
13. Behrens, A.N., *et al.* Sox7 is regulated by ETV2 during cardiovascular development. *Stem Cells Dev* **23**, 2004-2013 (2014).
14. Terman, B.I., *et al.* Identification of a new endothelial cell growth factor receptor tyrosine kinase. *Oncogene* **6**, 1677-1683 (1991).
15. Gordon, E.J., Gale, N.W. & Harvey, N.L. Expression of the hyaluronan receptor LYVE-1 is not restricted to the lymphatic vasculature; LYVE-1 is also expressed on embryonic blood vessels. *Dev Dyn* **237**, 1901-1909 (2008).
16. Polley, M.J., *et al.* CD62 and endothelial cell-leukocyte adhesion molecule 1 (ELAM-1) recognize the same carbohydrate ligand, sialyl-Lewis x. *Proc Natl Acad Sci U S A* **88**, 6224-6228 (1991).
17. Vincent, T., *et al.* A SNAIL1-SMAD3/4 transcriptional repressor complex promotes TGF-beta mediated epithelial-mesenchymal transition. *Nat Cell Biol* **11**, 943-950 (2009).
18. Cybulsky, M.I. & Gimbrone, M.A., Jr. Endothelial expression of a mononuclear leukocyte adhesion molecule during atherogenesis. *Science* **251**, 788-791 (1991).
19. Collins, T., *et al.* Structure and chromosomal location of the gene for endothelial-leukocyte adhesion molecule 1. *J Biol Chem* **266**, 2466-2473 (1991).
20. Dragoi, A.M., Swiss, R., Gao, B. & Agaisse, H. Novel strategies to enforce an epithelial phenotype in mesenchymal cells. *Cancer Res* **74**, 3659-3672 (2014).
21. Lorient, C., *et al.* Epithelial to mesenchymal transition is activated in metastatic pheochromocytomas and paragangliomas caused by SDHB gene mutations. *The Journal of clinical endocrinology and metabolism* **97**, E954-962 (2012).

22. Chang, C.J., *et al.* p53 regulates epithelial-mesenchymal transition and stem cell properties through modulating miRNAs. *Nat Cell Biol* **13**, 317-323 (2011).
23. Zhao, T., Ding, X., Chang, B., Zhou, X. & Wang, A. MTUS1/ATIP3a down-regulation is associated with enhanced migration, invasion and poor prognosis in salivary adenoid cystic carcinoma. *BMC Cancer* **15**, 203 (2015).
24. Lacher, M.D., *et al.* Transforming growth factor-beta receptor inhibition enhances adenoviral infectability of carcinoma cells via up-regulation of Coxsackie and Adenovirus Receptor in conjunction with reversal of epithelial-mesenchymal transition. *Cancer Res* **66**, 1648-1657 (2006).
25. Holen, I., *et al.* Loss of plakoglobin promotes decreased cell-cell contact, increased invasion, and breast cancer cell dissemination in vivo. *Breast cancer research : BCR* **14**, R86 (2012).
26. Tsuji, T., *et al.* Epithelial-mesenchymal transition induced by growth suppressor p12CDK2-AP1 promotes tumor cell local invasion but suppresses distant colony growth. *Cancer Res* **68**, 10377-10386 (2008).
27. Qin, L., *et al.* Steroid receptor coactivator-1 upregulates integrin alpha(5) expression to promote breast cancer cell adhesion and migration. *Cancer Res* **71**, 1742-1751 (2011).
28. Morita, T., Mayanagi, T. & Sobue, K. Dual roles of myocardin-related transcription factors in epithelial mesenchymal transition via slug induction and actin remodeling. *J Cell Biol* **179**, 1027-1042 (2007).
29. Haynes, J., Srivastava, J., Madson, N., Wittmann, T. & Barber, D.L. Dynamic actin remodeling during epithelial-mesenchymal transition depends on increased moesin expression. *Mol Biol Cell* **22**, 4750-4764 (2011).
30. Miao, L., *et al.* SPOCK1 is a novel transforming growth factor-beta target gene that regulates lung cancer cell epithelial-mesenchymal transition. *Biochem Biophys Res Commun* **440**, 792-797 (2013).
31. Fenouille, N., *et al.* The epithelial-mesenchymal transition (EMT) regulatory factor SLUG (SNAI2) is a downstream target of SPARC and AKT in promoting melanoma cell invasion. *PLoS One* **7**, e40378 (2012).
32. Wehbe, M., *et al.* Epithelial-mesenchymal-transition-like and TGFbeta pathways associated with autochthonous inflammatory melanoma development in mice. *PLoS One* **7**, e49419 (2012).
33. Shankar, J., *et al.* Pseudopodial actin dynamics control epithelial-mesenchymal transition in metastatic cancer cells. *Cancer Res* **70**, 3780-3790 (2010).
34. Xie, M., *et al.* Activation of Notch-1 enhances epithelial-mesenchymal transition in gefitinib-acquired resistant lung cancer cells. *Journal of cellular biochemistry* **113**, 1501-1513 (2012).
35. Leong, K.G., *et al.* Jagged1-mediated Notch activation induces epithelial-to-mesenchymal transition through Slug-induced repression of E-cadherin. *The Journal of experimental medicine* **204**, 2935-2948 (2007).
36. Groger, C.J., Grubinger, M., Waldhor, T., Vierlinger, K. & Mikulits, W. Meta-analysis of gene expression signatures defining the epithelial to mesenchymal transition during cancer progression. *PLoS One* **7**, e51136 (2012).
37. Vandewalle, C., *et al.* SIP1/ZEB2 induces EMT by repressing genes of different epithelial cell-cell junctions. *Nucleic acids research* **33**, 6566-6578 (2005).
38. Li, X., *et al.* The SDF-1/CXCR4 axis induces epithelial-mesenchymal transition in hepatocellular carcinoma. *Molecular and cellular biochemistry* **392**, 77-84 (2014).
39. Wellner, U., *et al.* The EMT-activator ZEB1 promotes tumorigenicity by repressing stemness-inhibiting microRNAs. *Nature cell biology* **11**, 1487-1495 (2009).
40. Fischer, A., *et al.* Combined loss of Hey1 and HeyL causes congenital heart defects because of impaired epithelial to mesenchymal transition. *Circ Res* **100**, 856-863 (2007).

41. Cooley, B.C., *et al.* TGF-beta Signaling Mediates Endothelial-to-Mesenchymal Transition (EndMT) During Vein Graft Remodeling. *Science translational medicine* **6**, 227ra234 (2014).
42. Zavadil, J., Cermak, L., Soto-Nieves, N. & Bottinger, E.P. Integration of TGF-beta/Smad and Jagged1/Notch signalling in epithelial-to-mesenchymal transition. *EMBO J* **23**, 1155-1165 (2004).
43. Kato, S., Hayakawa, Y., Sakurai, H., Saiki, I. & Yokoyama, S. Mesenchymal-transitioned cancer cells instigate the invasion of epithelial cancer cells through secretion of WNT3 and WNT5B. *Cancer science* **105**, 281-289 (2014).
44. Zhang, P., Cai, Y., Soofi, A. & Dressler, G.R. Activation of Wnt11 by transforming growth factor-beta drives mesenchymal gene expression through non-canonical Wnt protein signaling in renal epithelial cells. *J Biol Chem* **287**, 21290-21302 (2012).
45. Bielez, B., *et al.* Epithelial Notch signaling regulates interstitial fibrosis development in the kidneys of mice and humans. *J Clin Invest* **120**, 4040-4054 (2010).
46. Alsarraj, J., *et al.* Deletion of the proline-rich region of the murine metastasis susceptibility gene Brd4 promotes epithelial-to-mesenchymal transition- and stem cell-like conversion. *Cancer Res* **71**, 3121-3131 (2011).
47. Loeffler, I., Liebisch, M. & Wolf, G. Collagen VIII influences epithelial phenotypic changes in experimental diabetic nephropathy. *American journal of physiology. Renal physiology* **303**, F733-745 (2012).
48. Mendez, M.G., Kojima, S. & Goldman, R.D. Vimentin induces changes in cell shape, motility, and adhesion during the epithelial to mesenchymal transition. *Faseb J* **24**, 1838-1851 (2010).
49. Risolino, M., *et al.* Transcription factor PREP1 induces EMT and metastasis by controlling the TGF-beta-SMAD3 pathway in non-small cell lung adenocarcinoma. *Proc Natl Acad Sci U S A* **111**, E3775-3784 (2014).
50. Shafieian, M., Chen, S. & Wu, S. Integrin-linked kinase mediates CTGF-induced epithelial to mesenchymal transition in alveolar type II epithelial cells. *Pediatric research* **77**, 520-527 (2015).
51. Beach, J.R., *et al.* Myosin II isoform switching mediates invasiveness after TGF-beta-induced epithelial-mesenchymal transition. *Proc Natl Acad Sci U S A* **108**, 17991-17996 (2011).
52. Gervasi, M., *et al.* JunB contributes to Id2 repression and the epithelial-mesenchymal transition in response to transforming growth factor-beta. *J Cell Biol* **196**, 589-603 (2012).
53. Serova, M., *et al.* Epithelial-to-mesenchymal transition and oncogenic Ras expression in resistance to the protein kinase Cbeta inhibitor enzastaurin in colon cancer cells. *Mol Cancer Ther* **9**, 1308-1317 (2010).
54. Joseph, J.V., *et al.* TGF-beta is an inducer of ZEB1-dependent mesenchymal transdifferentiation in glioblastoma that is associated with tumor invasion. *Cell death & disease* **5**, e1443 (2014).
55. Xiong, L., Wen, Y., Miao, X. & Yang, Z. NT5E and FcGBP as key regulators of TGF-1-induced epithelial-mesenchymal transition (EMT) are associated with tumor progression and survival of patients with gallbladder cancer. *Cell Tissue Res* **355**, 365-374 (2014).
56. Taube, J.H., *et al.* Core epithelial-to-mesenchymal transition interactome gene-expression signature is associated with claudin-low and metaplastic breast cancer subtypes. *Proc Natl Acad Sci U S A* **107**, 15449-15454 (2010).
57. Park, M.Y., *et al.* Expression of the serum response factor in hepatocellular carcinoma: implications for epithelial-mesenchymal transition. *International journal of oncology* **31**, 1309-1315 (2007).
58. Yang, J., *et al.* Disruption of tissue-type plasminogen activator gene in mice reduces renal interstitial fibrosis in obstructive nephropathy. *J Clin Invest* **110**, 1525-1538 (2002).
59. Gilkes, D.M., Bajpai, S., Chaturvedi, P., Wirtz, D. & Semenza, G.L. Hypoxia-inducible factor 1 (HIF-1) promotes extracellular matrix remodeling under hypoxic conditions by inducing P4HA1, P4HA2, and PLOD2 expression in fibroblasts. *J Biol Chem* **288**, 10819-10829 (2013).

60. Sarrio, D., *et al.* Epithelial-mesenchymal transition in breast cancer relates to the basal-like phenotype. *Cancer Res* **68**, 989-997 (2008).
61. Wiercinska, E., *et al.* The TGF-beta/Smad pathway induces breast cancer cell invasion through the up-regulation of matrix metalloproteinase 2 and 9 in a spheroid invasion model system. *Breast cancer research and treatment* **128**, 657-666 (2011).
62. Jechlinger, M., *et al.* Expression profiling of epithelial plasticity in tumor progression. *Oncogene* **22**, 7155-7169 (2003).
63. Inai, K., Burnside, J.L., Hoffman, S., Toole, B.P. & Sugi, Y. BMP-2 induces versican and hyaluronan that contribute to post-EMT AV cushion cell migration. *PLoS One* **8**, e77593 (2013).
64. Liu, L., *et al.* Notch3 is important for TGF-beta-induced epithelial-mesenchymal transition in non-small cell lung cancer bone metastasis by regulating ZEB-1. *Cancer gene therapy* **21**, 364-372 (2014).
65. Nanda, A., *et al.* Tumor endothelial marker 1 (Tem1) functions in the growth and progression of abdominal tumors. *Proc Natl Acad Sci U S A* **103**, 3351-3356 (2006).
66. Lax, S., *et al.* CD248 expression on mesenchymal stromal cells is required for post-natal and infection-dependent thymus remodelling and regeneration. *FEBS open bio* **2**, 187-190 (2012).
67. Mirza, A., *et al.* Investigation of the epithelial to mesenchymal transition markers S100A4, vimentin and Snail1 in gastroesophageal junction tumors. *Diseases of the esophagus : official journal of the International Society for Diseases of the Esophagus / I.S.D.E* **27**, 485-492 (2014).
68. Haque, I., *et al.* Cyr61/CCN1 signaling is critical for epithelial-mesenchymal transition and stemness and promotes pancreatic carcinogenesis. *Molecular cancer* **10**, 8 (2011).
69. Tan, X., Dagher, H., Hutton, C.A. & Bourke, J.E. Effects of PPAR gamma ligands on TGF-beta1-induced epithelial-mesenchymal transition in alveolar epithelial cells. *Respir Res* **11**, 21 (2010).
70. Li, H., Duhachek-Muggy, S., Dubnicka, S. & Zolkiewska, A. Metalloproteinase-disintegrin ADAM12 is associated with a breast tumor-initiating cell phenotype. *Breast cancer research and treatment* **139**, 691-703 (2013).
71. Gujral, T.S., *et al.* A noncanonical Frizzled2 pathway regulates epithelial-mesenchymal transition and metastasis. *Cell* **159**, 844-856 (2014).
72. Cho, S.H., *et al.* CD44 enhances the epithelial-mesenchymal transition in association with colon cancer invasion. *International journal of oncology* **41**, 211-218 (2012).
